1 Radiating despite a lack of character: closely related, morphologically similar, co-  
2 occurring honeyeaters have diverged ecologically

3

4 Eliot T. Miller<sup>1,2,3</sup>

5 Sarah K. Wagner<sup>4,5</sup>

6 Luke J. Harmon<sup>3,6</sup>

7 Robert E. Ricklefs<sup>1</sup>

8

9 1. Harris World Ecology Center and Department of Biology, University of Missouri, St.  
10 Louis, 63121, USA

11 2. Department of Biological Sciences, Macquarie University, Sydney, NSW, 2109,  
12 Australia

13 3. Department of Biological Sciences, University of Idaho, Moscow, Idaho, 83844, USA

14 4. Ecology and Evolutionary Biology Department, University of Colorado, Boulder,  
15 Colorado, 80309, USA

16 5. Cornell Lab of Ornithology, Cornell University, Ithaca, NY, 14950, USA

17 6. Institute for Bioinformatics and Evolutionary Studies (IBEST), University of Idaho,  
18 Moscow, Idaho, 83844, USA

19

20

21 Keywords: phylogenetic niche conservatism, functional traits, interspecific competition,  
22 phylogenetic community structure, community assembly, ecomorphology

23

# 1 ABSTRACT

2 The 75 species of Australian honeyeaters (Meliphagidae) are morphologically and  
 3 ecologically diverse, with species feeding on nectar, insects, fruit, and other resources.  
 4 We investigated ecomorphology and community structure of honeyeaters across  
 5 Australia. First, we asked to what degree morphology and ecology (foraging behavior)  
 6 are concordant. Second, we estimated rates of trait evolution. Third, we compared  
 7 phylogenetic and trait community structure across the broad environmental gradients of  
 8 continental Australia. We found that morphology explained 37% of the variance in  
 9 ecology (and 62% vice versa), and that recovered multivariate ecomorphological  
 10 relationships incorporated well-known bivariate relationships. Clades of large-bodied  
 11 species exhibited elevated rates of morphological trait evolution, while members of  
 12 *Melithreptus* showed slightly faster rates of ecological trait evolution. Finally, ecological  
 13 trait diversity did not decline in parallel with phylogenetic diversity along a gradient of  
 14 decreasing precipitation. We employ a new method (trait fields) and extend another  
 15 (phylogenetic fields) to show that while species from phylogenetically clustered  
 16 assemblages co-occur with morphologically similar species, these species are as varied in  
 17 foraging behavior as those from more diverse assemblages. Thus, although closely  
 18 related, these arid-adapted species have diverged in ecological space to a similar degree  
 19 as their mesic counterparts, perhaps mediated by competition.

20

# 1 INTRODUCTION

2 Birds fly, whales swim, cheetahs run, and amoebae move (not very fast) via amoeboid  
3 movement. In organismal biology, the connection between form and function is intuitive  
4 and generally presumed to exist. When examined quantitatively, this assumption is often  
5 well supported (Miles and Ricklefs 1984; Miles et al. 1987; Saunders and Barclay 1992;  
6 Ricklefs and Miles 1994; Fitzpatrick et al. 2004; Leisler and Schulze-Hagen 2011). That  
7 species' traits influence their local abundance is a central tenet of evolutionary biology  
8 (Darwin 1859; Tilman 1988; McGill et al. 2006). The connection between a species'  
9 morphology, performance, and resource use—its ecology—has often led to the use of  
10 morphology as a surrogate for ecology. While ecology itself can be difficult to measure  
11 and variable across time (Lovette and Holmes 1995) and space (Suryan et al. 2000),  
12 morphology can be measured quickly and is assumed to integrate over the life span of the  
13 individual and to reflect past selective pressures. Morphological variation influences  
14 ecological relationships and determines where individuals of a species can survive and  
15 which species can coexist in local assemblages.

16 Of course, similar ecologies can be realized through dissimilar morphologies, and  
17 a single morphology can serve varied purposes (Wainwright 2007). Caterpillars and  
18 giraffes both feed on leaves, and while many kingfishers specialize on fish, others focus  
19 almost entirely on terrestrial prey. Evolutionary constraints at multiple levels shape how  
20 species do and do not adapt to their environment (Arnold 1992; Futuyma 2010). For  
21 instance, Allen's rule has been shown to influence morphology in birds, with species  
22 from colder climes characterized by shorter beaks (Allen 1877; Symonds and Tattersall  
23 2010), and perhaps shorter legs. Thus, beak size may not be free to evolve towards a

1 given adaptive peak, as it may be subject to conflicting selective pressures and, if beak  
2 length and leg length are genetically correlated, then evolution in some morphological  
3 directions may be constrained (Schluter 1996).

4 A species' evolutionary history—the past selective regimes that have shaped its  
5 gene pool—may also constrain its adaptations. The ancestral state of a population can  
6 also influence which local adaptive peak it settles on (Hansen and Houle 2008). In  
7 addition, a given resource might be exploited by organisms sitting on several adaptive  
8 peaks, as in the case of caterpillars and giraffes feeding on the same leaves. Thus, while  
9 we expect some relationship between morphology and ecology among phylogenetically  
10 restricted groups of species, some authors have concluded that at a broader level “the  
11 strong influence of phylogeny within the trophic relationships of an assemblage negate[s]  
12 the value of an ecomorphological analysis” (Douglas and Matthews 1992). The amount  
13 of variance that morphology can explain in ecology, and whether tight ecomorphological  
14 relationships exist across large clades, warrants further study.

15 Environmental pressures push species within local assemblages to resemble each  
16 other, either through evolutionary processes or habitat filtering. Relatedly, if some  
17 lineages fail to colonize novel habitats from their ancestors, then across large climatic  
18 gradients these environmental pressures can lead to a reduction in phylogenetic diversity  
19 (Latham and Ricklefs 1993; Wiens and Donoghue 2004), presumably associated with a  
20 concomitant loss in morphological diversity. Yet, cursory examination of any naturally  
21 co-occurring set of species emphasizes that additional forces, particularly interspecific  
22 competition, act to reduce similarity among related species. This spectrum of possible  
23 community assembly processes forms the basis for studies on phylogenetic community

structure (Webb et al. 2002). This proxy approach uses evolutionary relationships to indicate ecological similarity. A complementary approach to studying community assembly makes use of functional traits (McGill et al. 2006). Based largely on broad latitudinal trends in functional traits (Wright et al. 2004) and more limited ecophysiological assessments (Lambers and Poorter 2004), some authors have recently assessed the functional trait composition of local plant assemblages around the globe (Cornwell et al. 2006; Kraft and Ackerly 2010). Such studies are based on the assumption that these morphological traits have real-life ecological consequences within communities, and not just across communities. A functional trait approach based on morphology is itself a proxy for species' ecologies.

Compared to the growing botanical literature, few modern studies have employed functional trait approaches to characterize bird assemblages (Luther 2009; Gómez et al. 2010; Ricklefs 2011; Ricklefs 2012; Dehling et al. 2014; Tobias et al. 2014), though this previously was an active area of research (Karr and James 1975; Ricklefs and Travis 1980; Keast and Recher 1997). Few studies have focused on ecological measures (e.g., foraging behavior), and little attention has been paid to changes in community organization across ecological gradients.

Limited phylogenetic diversity coupled with ecological opportunity may initiate a phase of adaptive radiation (Schluter 2000). While authors have differed on what constitutes an adaptive radiation (Givnish and Sytsma 2000; Schluter 2000; Givnish 2015), the general phenomenon of evolutionary diversification given ecological opportunity might characterize many lineages not traditionally recognized as being adaptive radiations. In such lineages we might expect to see increased rates of trait

1 evolution compared to related lineages that have diversified in more stable environments.  
2 Thus, environmental pressures in combination with phylogenetic niche conservatism  
3 might lead to a loss of phylogenetic diversity, followed by a subsequent radiation in  
4 ecomorphological space by the lineages able to colonize these new areas.

5       The Australian honeyeaters (Meliphagidae) comprise a group of 75 species of  
6 passerine birds distributed across the continent, with at least one species found in almost  
7 every habitat type. Honeyeater species vary from large-bodied generalists like the Yellow  
8 Wattlebird (*Anthochaera paradoxa*, > 160 g) to small, decurved-billed nectarivores like  
9 the Red-headed Myzomela (*Myzomela* 7-8 g), and from stout-billed, ground-foraging  
10 insectivores like the Gibberbird (*Ashbyia lovensis*), to frequent frugivores like the Painted  
11 Honeyeater (*Grantiella picta*) (Higgins et al. 2001). A strong pattern of increasing  
12 phylogenetic clustering follows the gradient of decreasing precipitation, as mesic-adapted  
13 lineages drop out towards the arid interior of the continent (Miller et al. 2013). Yet,  
14 Meliphagidae species richness does not decline precipitously along this precipitation  
15 gradient, a fact that Miller et al. (2013) attributed, in part, to ecological opportunity and  
16 strong selective pressure to adapt to the newly opened desert habitats as Australia  
17 underwent dramatic aridification from the Miocene onwards.

18       In this paper, we address how evolution and ecology interact to determine species  
19 composition, local abundance, and trait diversity in honeyeater assemblages in Australia.  
20 We explore how these relationships change over climate gradients from both  
21 morphological and ecological perspectives. We ask whether trait diversity varies in  
22 parallel with phylogenetic diversity across local assemblages. When we find that it does  
23 not, we consider whether the phylogenetically limited subset of arid-adapted lineages has

1 diversified phenotypically to fill trait space similarly to their mesic counterparts.  
 2 Specifically, we test whether desert species evolved through trait space more rapidly,  
 3 perhaps to fill ecological space left vacant as some lineages drop out along the  
 4 precipitation gradient. We do so by analyzing two large, near-comprehensive datasets  
 5 summarizing the morphological and ecological diversity of the Australian Meliphagidae.  
 6 We predict the existence of strong ecomorphological relationships across the family  
 7 (crown age ~ 20 mya), reflecting the biological axiom that form reflects function. Using  
 8 the intersection of ecomorphology and distribution within the Australian continent  
 9 (Miller et al. 2013), we test the prediction that lineages of phylogenetically clustered arid  
 10 zone birds evolved rapidly in trait space to fill novel desert habitats and, accordingly,  
 11 break the link between trait disparity and phylogenetic diversity.

12

## 13 METHODS

### 14 *Morphological data collection and processing*

15 We used digital calipers and photograph analysis (ImageJ, Schneider et al. 2012) to  
 16 assemble a set of linear measurements on museum specimens: culmen length from front  
 17 of the nares to bill tip; culmen length from base (kinetic hinge) of the bill to tip; exposed  
 18 maxilla and bill chord (ImageJ); bill width and depth at both the nares and the base; wing  
 19 chord (length from carpal joint to longest primary wing feather); length of the longest  
 20 secondary wing feather; tarsus, hind toe and mid toe lengths; tail and total body lengths.  
 21 Whenever possible, we measured at least 3 males and 3 females of each  
 22 species/subspecies. We used ImageJ and spread-wing specimens to quantify total wing  
 23 area, the length (along the axis of the wing) and width (widest point perpendicular to the

1 wing axis) of the spread wing, and the lengths of the longest primary, the longest  
2 secondary, and the outermost/first secondary feather. We used these wing measurements  
3 to calculate the hand-wing index (supplementary material), which is a proxy for a wing's  
4 aspect ratio, i.e., a measure of its shape, from rounded to pointed, generally associated  
5 with maneuverability versus long-distance flight and strong dispersal (Claramunt et al.  
6 2012). Linear measurements are illustrated in the supplementary material.

7 We calculated the following additional indices: bill curvature, the quotient of the  
8 maxilla length over its chord (Rico-Guevara and Araya-Salas 2014); and a bill length  
9 index:  $100 \times (\text{bill length from base} - \text{bill length from nares}) / \text{bill length from base}$ . Large  
10 values of the bill length index correspond to species where most of the length of the bill  
11 is proximal to the nares (e.g., Yellow Wattlebird, *Anthochaera paradoxa*), while small  
12 values correspond to species where most of the length is distal to the nares (e.g., Eastern  
13 Spinebill, *Acanthorhynchus tenuirostris*). We calculated bill width and depth indices in a  
14 similar fashion (using the width/depth at the base vs. the nares). Here, large values  
15 correspond to bills that taper considerably from base to tip in their width (White-gaped  
16 Honeyeater, *Stomiopera unicolor*) or their depth (Orange Chat, *Epthianura aurifrons*).  
17 These indices provide some indication of bill shape; many Tyrannidae flycatchers, for  
18 instance, have bills that are wide near the base and taper considerably towards the tip.

19 When available, we used the mass of the bird at collection as recorded on the  
20 specimen tag (37% of specimens). When no value was provided, we used the best  
21 information available to assign an approximate mass to each specimen. Specifically, if  
22 the sex of the specimen was known and a large sample of sex-specific, subspecies-  
23 specific masses was available (Higgins et al. 2001), we used that mass (59% of



specimens). Otherwise, we used the next higher level of specificity, e.g., the sex-specific average mass across all subspecies of that species, etc. In this way, we assigned a mass to all specimens. We were unable to measure any specimens of the range-restricted Eungella Honeyeater (*Bolemoreus hindwoodi*), and excluded it from morphological analyses.

# *Ecological data collection and processing*

Collection of ecological information, primarily foraging behavior, followed protocols of Miller & Wagner (2014), which were based on standardized methods (Remsen and Robinson 1990). Between July 2009 and May 2014, we spent 295 field days throughout continental Australia, Kangaroo Island, and Tasmania (Fig. 1). When not driving between sites, we spent the daylight hours walking transects recording foraging movements, substrates, and food items. For each observation, we recorded the time, location, substrate on which the bird foraged, the attack maneuver employed, whether the bird was hanging during the maneuver, the height of the foraging bird, the height of the surrounding canopy, the distance of the bird from the trunk, and the density of foliage around the foraging bird. These last two variables were recorded on an ordinal scale. See the supplementary material for a complete list of all possible substrates, maneuvers, and details on foliage density and distances from the trunk.

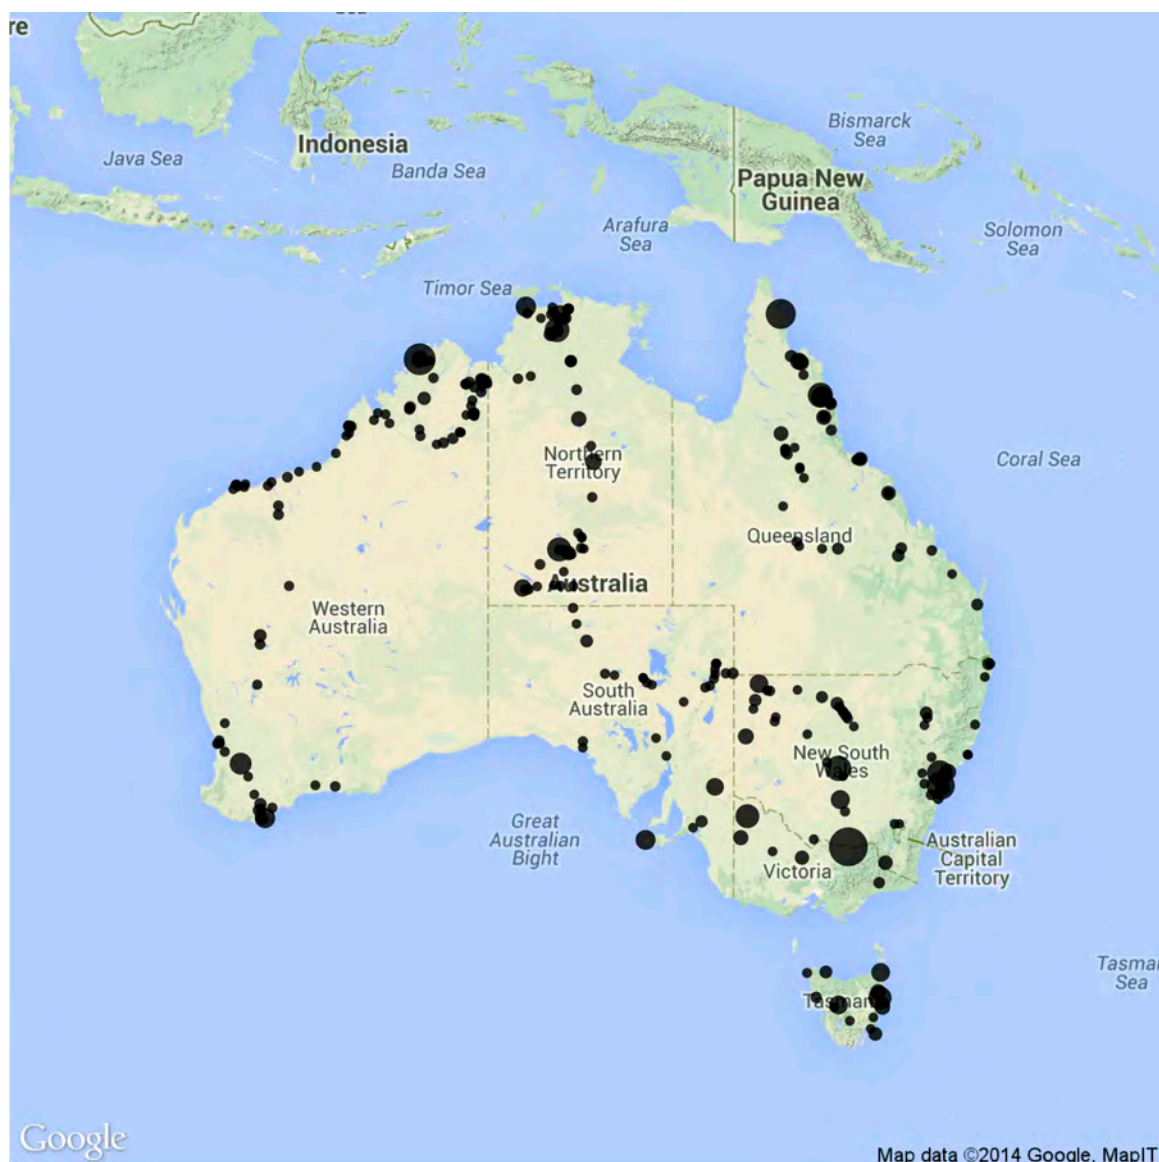

Figure 1. Map of Australia, showing the locations where foraging observations for this study were made. The size of the dot corresponds to the number of independent observations that were recorded at that site.

If the first foraging maneuver we observed initially drew our attention to an individual bird, we discarded the observation to minimize bias. Otherwise, if we located a bird, for instance, by its vocalizations, we recorded the first maneuver we saw. We

endeavored to record only one observation per individual per day. To better understand individual variation in foraging behavior, in some cases we did record multiple observations from single birds. However, we considered such series of observations as collectively representing a single data point. We chose 20 independent observations as the minimum required for analysis of a species' niche. We did not meet this requirement for the elusive Gray Honeyeater (*Conopophila whitei*), and therefore excluded it from ecological analyses.

8

#### 9 *Meliphagidae assemblage and climatic data assembly*

10 We used the species distribution dataset from Miller et al. (2013). This taxonomically and  
11 spatially cleaned dataset contains 2,273,404 localized observations of individuals across  
12 all Meliphagidae species. The data were downloaded and concatenated from eBird  
13 (Sullivan et al. 2009) and the Atlas of Living Australia (<http://www.ala.org.au/>). We  
14 defined assemblages as the species occurring within 100×100-km grid cells. In many  
15 parts of Australia it is a reasonable assumption that all species in a grid cell could interact  
16 ecologically. For instance, while collecting foraging data, we occasionally recorded a  
17 species list for the area. On average, we observed a mean of 40% of the bird species  
18 recorded from a given grid cell each day ( $n = 27$ ,  $SD = 16\%$ ,  $\max = 100\%$ ,  $\min = 21\%$ ).  
19 We ran analyses using both the presence-absence community data matrix (CDM) and the  
20 relative abundance CDM which, to the extent that our assessment of abundance can be  
21 relied upon, can reduce the influence of vagrants and provide added biological detail on  
22 the effects of habitat filtering and competitive exclusion.

1 We used the mean annual temperature (MAT) and precipitation (MAP) layers  
2 from WorldClim (<http://www.worldclim.org/bioclim>), as summarized in Miller et al.  
3 (2013), to quantify variation in climate across the continent.

4

#### 5 *Definition and summary of multivariate trait spaces*

6 We log-transformed all linear morphological measurements (but not the composite  
7 indices), and then calculated species' averages for all morphological and ecological  
8 measures. For ecological measures, species' traits refer to mean average foraging height,  
9 proportion of attacks that were gleaners, proportion of attacks that were to flowers, etc.

10 We used the R (R Development Core Team 2011) package *phytools* (Revell 2012)  
11 to ordinate each dataset separately with a phylogenetic correlation matrix-principal  
12 components analysis (pPCA, Revell 2009), i.e. a PCA where the Brownian-motion  
13 expected degree of covariance among species' traits is incorporated into the calculation  
14 of PC axes and scores. To visualize how the Meliphagidae explored these trait spaces, we  
15 used a color-coded phylomorphospace approach (Miller et al. 2013), based on an  
16 updated, time-calibrated version of the Meliphagidae phylogeny for all analyses (Joseph  
17 et al. 2014), with 9 species added manually as in Miller et al. (2013) and Mast et al.  
18 (2015).

19 To quantify the phylogenetic signal in species' morphological and ecological  
20 traits, we used the R package *geomorph* (Adams 2014). This approach incorporates the  
21 multivariate nature of these data, and instead of calculating a separate value per trait or  
22 principal component axis, outputs a single K value (Blomberg et al. 2003) that integrates  
23 all of the species' traits simultaneously.

1

## 2 *Concordance of morphology and ecology*

3 To examine the degree to which morphology predicts species' ecologies, and vice versa,  
 4 we used a phylogenetic canonical correlation analysis (pCCA, Revell and Harrison  
 5 2008). We interpreted the initial *phytools* results with custom scripts that calculate the  
 6 phylogenetic generalized least squares (PGLS) correlation coefficients of the raw trait  
 7 variables with species' positions along the derived ecological and morphological  
 8 canonical axes. We then used these correlation coefficients to calculate redundancy  
 9 indices (Stewart and Love 1968) with the *candisc* package. These indices provide a  
 10 measure of the amount of variance in the ecological dataset that can be explained with the  
 11 morphological dataset, and vice versa. Many of the ecological variables are zero-skewed,  
 12 reflecting the paucity of certain foraging behaviors, thus we repeated these analyses  
 13 excluding the most zero-skewed behaviors. Because results were qualitatively identical  
 14 with either ecological dataset, we do not discuss results from the reduced ecological  
 15 dataset in detail.

16

## 17 *Calculation of assemblage trait disparity*

18 We quantified (separately) the variation in morphological and ecological traits of species  
 19 within each assemblage. To do this, we used species' positions in multivariate trait space  
 20 to calculate trait disparity as the mean pairwise distance ( $MPD_{\text{trait}}$ ) in Euclidean space  
 21 among the points from a given assemblage, as defined in the community data matrices  
 22 (CDMs). We did this both with the presence-absence and relative abundance CDMs  
 23 (interspecific abundance-weighted MPD, Miller et al. 2015). A large value for this index

1 signifies an assemblage composed of species that are, on average, widely separated from  
2 each other in trait space, while a small value signifies an assemblage of species that are  
3 clustered in trait space. When used with relative abundance data, common species  
4 contribute more to  $MPD_{\text{trait}}$ , and distances between such species more strongly influence  
5 the metric.

6 To account for the potential influence of dispersal limitation on community  
7 structure, we calculated standardized effect sizes (SES) of these trait distances, after  
8 1,000 randomizations, using a new dispersal null model. This model constructs CDMs  
9 where assemblage species richness, individual species' occurrence frequencies, and total  
10 CDM abundance (i.e., total number of individuals in the CDM) are maintained, and it  
11 settles species in these assemblages with a probability proportional to their relative  
12 abundance in nearby cells, thereby incorporating dispersal probabilities directly into  
13 expectations. We used the product of the geographic distance matrix (great circle  
14 distances) and the environmental distance matrix (Euclidean distance after correlation  
15 matrix PCA) as our measure of distance among grid cells. These distances are  
16 standardized scores that reflect observed assemblage deviation from expected trait  
17 packing metrics ( $MPD_{\text{trait}}$ ) given realistic assembly processes. As an additional check on  
18 these results, in the supplementary material we also derived SES using a null model that  
19 maintains observed species richness but not occurrence frequencies or dispersal  
20 probabilities.

21 To compare how these standardized trait disparity scores scale with phylogenetic  
22 diversity, we calculated similar SES for mean pairwise phylogenetic distance ( $MPD_{\text{phylo}}$ )  
23 using both the new null model and, in supplementary material, the richness only model.

1 Like the SES for trait disparity, large SES values here reflect assemblages that are  
2 composed of species that are evenly spread across the phylogeny, compared to null  
3 expectations.

4

#### 5 *Species-based measures of trait evolution*

6 To calculate species-specific rates of trait evolution, we built on functions from *convevol*  
7 (Stayton 2015) to calculate the distance evolved, along the inferred evolutionary  
8 branches, of each species through multivariate trait space from the inferred root. The  
9 resulting “traits” represent the total distance evolved by a given species (and its  
10 ancestors) from the most recent common ancestor (crown node) of the honeyeaters. Thus,  
11 large values reflect species that are deduced to have undergone notable phenotypic shifts  
12 over their evolutionary history. We then input these species-specific “traits” into a trait-  
13 diversification analysis in BAMM (Rabosky 2014; Rabosky et al. 2014), and took the tip-  
14 averaged trait diversification rates as our measure of rate of trait evolution away from the  
15 root of the Meliphagidae. This method tests whether certain species, such as those from  
16 the desert, have evolved through trait space at a faster rate than others.

17 We developed a method to quantify how different a species is, phylogenetically or  
18 in trait space, from the numerous species it occurs with across its range. The goal was to  
19 provide a species-centered examination of the prediction that species from  
20 phylogenetically clustered assemblages have evolved through trait space at a faster rate  
21 than those from less phylogenetically clustered assemblages. Building upon the work of  
22 Villalobos et al. (2013), we extended the phylogenetic field concept to include  
23 standardized effect sizes (SES) and abundance-weighting. Thus, we defined a species’

phylogenetic field as the weighted mean of either the non-abundance-weighted (hereafter, “unweighted”) or interspecific abundance-weighted  $MPD_{phylo}$  of the grid cells it occurred in (Miller et al. 2015). The weights used in this species-specific measure were that species’ relative abundance in those grid cells (when using unweighted MPD, this reduces to a standard, unweighted mean). Similarly, we defined a species’ trait field as the weighted mean of the ecological or morphological trait neighborhood ( $MPD_{trait}$ ) it occurs in across its range. We defined the standardized form of these trait and phylogenetic fields by deriving 1,000 CDMs with the dispersal null model (and 1,000 CDMs with the richness null in supplementary material), and then used these to calculate simulated species’ fields. We used these values to calculate field SES, per species, as the difference between the observed field and the mean of the simulated fields divided by the standard deviation. Thus, for each species, this metric measures the average properties of local assemblages in which that species occurs. For instance, species with large trait field SES values occur in assemblages with species that are evenly distributed in trait space, after accounting for dispersal probabilities and observed species richness. Scripts to calculate phylogenetic and trait fields, including the standardized versions of these, have been included in the *metricTester* package (Miller et al. 2015).

### *Correlating patterns of trait evolution, trait community structure, and climate*

To test our prediction that Meliphagidae trait disparity does not parallel phylogenetic diversity, we used ordinary least squares (OLS) regression to compare the standardized morphological and ecological trait disparity scores from each grid cell with their underlying MAT and MAP.



To further examine any disconnect between trait and phylogenetic diversity, we explored rates of trait evolution and their potential drivers. Taking a species-specific perspective, we used PGLS regressions to test whether rates of morphological or ecological trait evolution from the BAMM analysis were correlated with a species' phylogenetic field. This approach considers species individually, and does not consider whether the co-occurring species are evenly partitioning trait space (e.g., it is possible that all species in an assemblage could have evolved quickly towards the same trait combination). Thus, we also used PGLS to compare species' trait fields with their phylogenetic fields. This approach more directly compares how a species partitions niche space among its potential competitors as a function of the phylogenetic neighborhood it finds itself in. For example, if species in phylogenetically clustered assemblages were widely separated in trait space, then, despite close phylogenetic relationship, such species would be evenly partitioning niche space with their potential competitors.

## RESULTS

### *Summary of the datasets*

We measured 710 specimens of 74 of 75 Australian Meliphagidae species, although we did not take the complete set of measurements on each specimen. Sample sizes range from 1 for the range-restricted White-lined Honeyeater (*Meliphaga albilineata*), to 36 for White-plumed Honeyeater (*Ptilotula penicillata*). The species-averaged dataset will be available upon publication of the final version of this manuscript.

We collected 9,595 foraging observations across 74 species of Australian honeyeater. After accounting for serial observations, the dataset contains 7,302

1 independent observations. The most-observed species was Brown Honeyeater (*Lichmera*  
2 *indistincta*, n=459). The least-observed species was Green-backed Honeyeater  
3 (*Glycichaera fallax*, n=20). The one individual observed of Gray Honeyeater  
4 (*Conopophila whitei*) was excluded from analysis. The species-averaged dataset provides  
5 detailed, quantitative measures of the foraging ecology of a large continental radiation of  
6 vertebrates, and will be available upon publication of the final version of this manuscript.

### 7 *Multivariate trait spaces*

9 The first three axes (out of 15) from the morphological PCA captured 78% of the  
10 variance in the dataset. The first described differences in overall body size. The second  
11 described an axis of variation from species with long, decurved bills to those with nares  
12 positioned towards the middle of the bill, and bills whose depth and width taper  
13 considerably over their length. The third axis separated species with rounded wings and  
14 long bills that taper in depth (e.g., Eastern Spinebill, *Acanthorhynchus tenuirostris* and  
15 Tawny-breasted Honeyeater, *Xanthotis flaviventer*) from those with pointed wings and  
16 bills with much of the length proximal to the nares (e.g., Regent Honeyeater,  
17 *Anthochaera phrygia* and Yellow-throated Honeyeater, *Nesoptilotis flavicollis*).  
18 Multivariate K for the morphological dataset was 0.863 ( $p = 0.001$  that K differs from 0),  
19 emphasizing that species show a strong tendency to resemble their ancestors (Fig. 2).



1 *corniculatus*), Red Wattlebird (*Anthochaera carunculata*), White-eared Honeyeater  
 2 (*Nesoptilotis leucotis*), Brown-backed Honeyeater (*Ramsayornis modestus*), Eastern  
 3 Spinebill (*Acanthorhynchus tenuirostris*), and Macleay's Honeyeater (*Xanthotis*  
 4 *macleayanus*). The *Ramsayornis* and *Xanthotis* photos are by Bryan Suson; all others  
 5 used under a Creative Commons license.

6

7       Of the 30 axes from the ecological pPCA, the first three described 37% of the  
 8 variance in the dataset (the first 10 described 76%). With the reduced dataset (17  
 9 variables) the first three axes described 54% of the variance. Returning to the full 30-axis  
 10 phylogenetic pPCA, the first principal component described an axis of variation from  
 11 highly nectarivorous species that, when not foraging on flowers, tended to sally-strike for  
 12 flying invertebrates, to species that gleaned frequently from leaves and branches. The  
 13 second axis distinguished species that foraged among foliage and took food from amidst  
 14 leaves, from species that foraged more in the open and took food from hanging bark or  
 15 branches, and employed a rare foraging maneuver called gaping, whereby the bill is  
 16 inserted into a substrate such as a rolled leaf or under bark and levered up to pry open the  
 17 substrate. The third principal component differentiated species that foraged high in the  
 18 canopy and those that foraged on the ground, well away from the cover of trees.  
 19 Multivariate K for the ecological dataset was 0.471 ( $p = 0.002$ ), emphasizing that while  
 20 many species resemble their relatives in foraging behavior, others have become  
 21 differentiated by evolution across considerable ecological distances (Fig. 3).

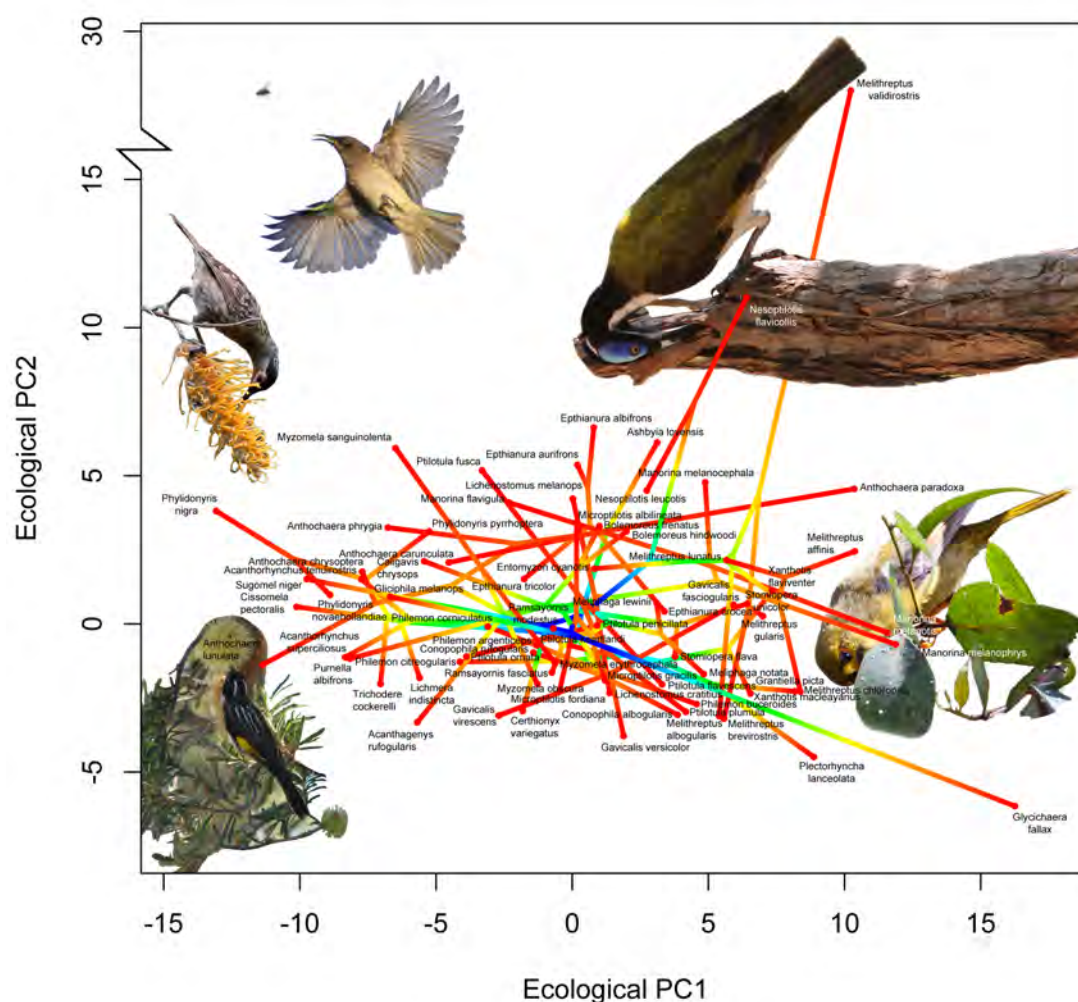

1  
2 Figure 3. Phylomorphospace showing the first two axes from the phylogenetic,  
3 correlation matrix-principal components analysis on the ecological data. Time since the  
4 root (~20 mya) is colored from blue to red. From left to right, the first axis separates  
5 highly nectarivorous species that, when not foraging on flowers, tend to sally-strike for  
6 aerial invertebrates, to species that glean frequently from leaves and branches. From top  
7 to bottom, the second separates species that forage more in the open and take prey from  
8 hanging bark, branches, and employ a rare foraging maneuver called gaping, to those that

forage in leafy situations and take prey from leaves. Not shown is the extreme position occupied by species of *Epthianura* and *Ashbyia* on the third axis. These first two axes account for 28% of the variance in the morphological dataset. Note the broken y-axis/extreme position occupied by Strong-billed Honeyeater (*Melithreptus validirostris*). Photographs are chosen to illustrate behaviors, rather than the species themselves. In clockwise order from the top right corner: Blue-faced Honeyeater (*Entomyzon cyanotis*) probing a branch, Bell Miner (*Manorina melanophrys*) gleaning lerp from a leaf, New Holland Honeyeater (*Phylidonyris novaehollandiae*) probing a *Banksia marginata* flower in dense vegetation, Macleay's Honeyeater (*Xanthotis macleayanus*) probing an exposed *Grevillea pteridifolia* flower, and Brown Honeyeater (*Lichmera indistincta*) sally-striking for an insect. The *Entomyzon* and *Xanthotis* photos are by Bryan Suson; all others used under a Creative Commons license.

#### *Canonical correlation analysis*

The first four axes of the pCCA were statistically significant (Table 1). Collectively, the morphological dataset explained 37% of the variance in the ecological dataset. The ecological dataset explained 62% of the variance in the morphological dataset. Proportions of variance explained were 39% and 41% with the reduced ecological dataset. The first canonical variate described an axis ranging from species with decurved bills and pointed wings that are highly nectarivorous and regularly sally-strike for aerial invertebrates to those with long tarsi and toes, wide and deep bills, and heavy mass that glean, forage on the ground and on branches, and employ pecking and sally-pouncing (Table 2). The second described an axis from species with long bills and tarsi that



1 frequent flowers with long corollas and often take insects in aerial pursuits, to those that  
 2 have short tarsi, pointed wings, and hang while foraging in tall canopies. The third  
 3 described a tradeoff between species with bills that taper considerably in depth and  
 4 forage on branches to those with deep, decurved bills that forage high in the canopy,  
 5 often from hanging bark, and glean fruits. The fourth described an axis from species with  
 6 bills that taper considerably in depth, employ pecking maneuvers, and forage on the  
 7 ground, well away from trees, to species with long tails, overall long body length, pointed  
 8 wings and a considerable portion of their bill proximal to the nares, and forage relatively  
 9 high in the available canopy, often on branches and on flowers with long corollas, and  
 10 often hang to do so (Table 2).

11

# 12 *Assemblage trait disparity and species richness and climate correlates*

13 Morphologically, most Meliphagidae assemblages did not deviate beyond statistical  
 14 expectations given the dispersal null model, which simulated realistic assembly processes  
 15 (i.e. their SES were between -1.96 and 1.96). The same was also true given a null model  
 16 that only maintained observed species richness (supplementary material). With presence-  
 17 absence data, none of 695 assemblages were significantly clustered in trait space, while  
 18 only one was significantly overdispersed. When calculations were species abundance-  
 19 weighted, one site was significantly clustered and nine were overdispersed.

20 Morphological SES for  $MPD_{\text{trait}}$  increased slightly along a gradient of increasing species  
 21 richness whether abundance-weighted ( $r^2 = 0.097$ ,  $p < 0.001$ ) or not ( $r^2 = 0.057$ ,  $p <$   
 22  $0.001$ ). Thus, species rich sites were composed of morphologically more evenly spaced  
 23 species.

1 Morphological SES  $MPD_{\text{trait}}$  decreased slightly along a gradient of increasing  
2 temperature (unweighted  $r^2 = 0.012$ ,  $p < 0.001$ ; abundance-weighted  $r^2 = 0.036$ ,  $p <$   
3  $0.001$ ), and increased slightly along a gradient of increasing precipitation ( $\log_{10}(\text{MAP})$ ,  
4 unweighted  $r^2 = 0.154$ ,  $p < 0.001$ ; abundance-weighted  $r^2 = 0.296$ ,  $p < 0.001$ ). Thus, the  
5 coldest, wettest sites contained species that were most evenly spread in morphological  
6 trait space, although this pattern was weak.

7 As in the case of morphological diversity, most Meliphagidae assemblages were  
8 not significantly structured in ecological space with the dispersal null model. When  
9 unweighted, six (of 695) assemblages were clustered and none were significantly  
10 overdispersed. When abundance-weighted, 25 were clustered and none were  
11 overdispersed. Approximately 10% of sites were considered significantly clustered with  
12 the simple richness null model (supplementary material). Unlike morphological trait  
13 disparity, when unweighted, ecological trait disparity was unrelated to species richness  
14 ( $r^2 < 0.001$ ,  $p = 0.501$ ), and when abundance-weighted, ecological SES  $MPD_{\text{trait}}$  was  
15 negatively correlated with species richness ( $r^2 = 0.196$ ,  $p < 0.001$ ). Thus, the most  
16 abundant species in the most species-rich sites were often ecologically similar.

17 Ecological trait disparity decreased slightly along gradients of increasing  
18 temperature when unweighted ( $r^2 = 0.066$ ,  $p < 0.001$ , relationship not significant when  
19 abundance-weighted). Ecological SES  $MPD_{\text{trait}}$  was also negatively correlated with  
20 precipitation (unweighted  $r^2 = 0.127$ ,  $p < 0.001$ ; abundance-weighted  $r^2 = 0.013$ ,  $p =$   
21  $0.003$ ). Thus, the coldest, driest sites tended to contain species that were most evenly  
22 spread in ecological trait space, although we emphasize that the overriding signal here  
23 was the absence of a strong pattern.



1 In short, Meliphagidae trait disparity does not closely parallel phylogenetic  
2 diversity (Fig. 4). Only weakly significant positive correlations exist between  
3 morphological trait disparity and phylogenetic diversity (unweighted  $r^2 = 0.174$ ,  $p <$   
4  $0.001$ ; abundance-weighted  $r^2 = 0.291$ ,  $p < 0.001$ ), and between ecological trait disparity  
5 and phylogenetic diversity (unweighted  $r^2 = 0.015$ ,  $p = 0.001$ ; abundance-weighted  $r^2 =$   
6  $0.112$ ,  $p < 0.001$ ).

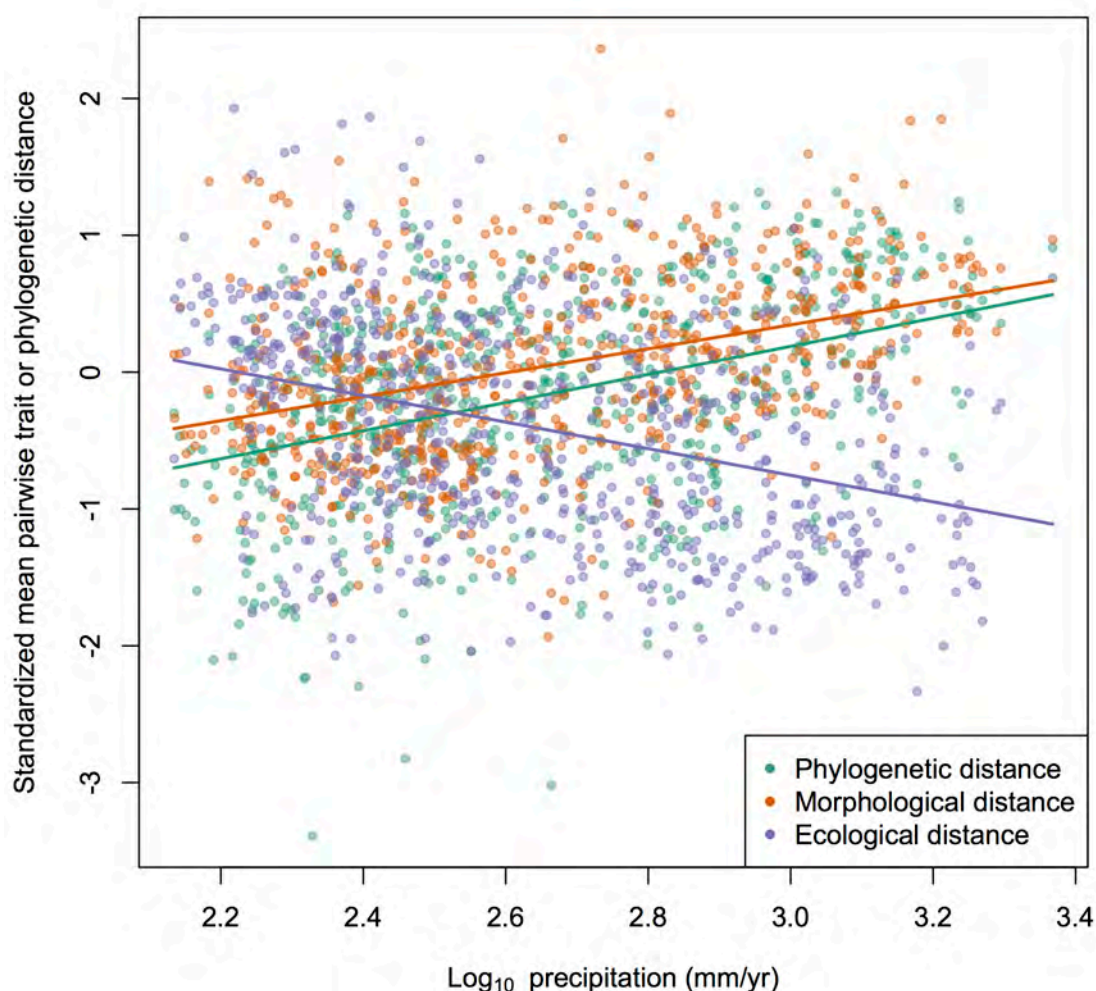

7

Figure 4. Standardized phylogenetic diversity and morphological and ecological trait disparity, per assemblage, as compared with the logged mean annual precipitation at the site. These mean pairwise phylogenetic distances and mean pairwise Euclidean distances in multivariate trait space were standardized with a null model that reflects dispersal probabilities and maintains species richness and occurrence frequencies in the simulated assemblages. While morphological disparity closely mirrors phylogenetic diversity, declining towards the arid interior, ecological disparity actually increases along the same gradient. Species in the desert, while closely related and similar looking, actually forage in dramatically different ways given their close affinities.

#### *Rates of trait evolution*

Considering distance evolved through trait space, the estimated sample size for all BAMM runs exceeded the recommended minimum of 200 (minimum used = 495) for both the potential number of shifts and the log-likelihood.

For morphological traits, the single best shift configuration included an increase in the rate of evolution of the wattlebird clade (*Anthochaera*, excluding *Acanthagenys*), and an otherwise overall declining rate of trait evolution (occurred in 23% of runs). Seven percent of the runs localized the *Anthochaera* shift one node deeper in time, in the clade that also includes Spiny-cheeked Honeyeater (*Acanthagenys rufogularis*), and 6% placed it one node deeper than that, in the clade that also includes Bridled Honeyeater (*Bolemoreus frenatus*; *B. hindwoodi* was not sampled). Another configuration, observed in 8% of runs, included three increases in rates of morphological trait evolution: in the *Anthochaera* clade, on the branch leading to Blue-faced Honeyeater (*Entomyzon*

1 *cyanotis*), and in the friarbird clade (*Philemon*). All other likely shift configurations were  
2 variations on this general theme; that is, they included increases in the rates of evolution  
3 of branches leading towards larger-bodied species.

4 For ecological traits, the single best shift configuration included no abrupt shifts  
5 in the rate of trait evolution, and a phylogeny-wide rate of trait evolution that declined  
6 continuously through time (frequency of occurrence 58%), suggesting that ecological  
7 space was filled relatively early in the evolution of the group. However, 18% of runs did  
8 include an increase in the rate of evolution of the Strong-billed (*Melithreptus*  
9 *validirostris*) + Brown-headed (*M. brevirostris*) + Black-chinned Honeyeater (*M. gularis*)  
10 clade (= *Eidopsarus*, Toon et al. 2010), 14% localized that shift on the Strong-billed  
11 branch, 5% placed the increase in rate of evolution one node deeper, on the clade that  
12 also included White-throated Honeyeater (*M. albogularis*), and 2% placed it at the base  
13 of the entire genus. These seven *Melithreptus* species, particularly those of the  
14 *Eidopsarus* subgenus, frequently probe branches and are notably less nectarivorous than  
15 most other Meliphagidae.

16

# 17 *Phylogenetic and trait fields*

18 After accounting for dispersal probability based on environmental and geographic  
19 distances, species tended to occur in overdispersed phylogenetic fields. When  
20 unweighted, mean SES MPD<sub>phylo</sub> was 5.45 (Wilcoxon signed rank test  $p < 0.001$ ). When  
21 abundance-weighted, the mean was 3.13 ( $p = 0.001$ ). With the richness null model, which  
22 does not account for dispersal probability, species tended to occur in clustered  
23 phylogenetic fields (supplementary results). Morphologically, species were variable in

terms of the trait fields they occurred in, ranging from  $SES = -10.89$  to  $10.22$  when unweighted (mean =  $0.01$ , Wilcoxon test that  $\mu = 0$ ,  $p = 0.43$ ). Species were similarly variable when  $MPD_{\text{trait}}$  was abundance-weighted, ranging from  $-15.75$  to  $18.35$ , but there was a significant trend towards overdispersion (mean  $3.45$ ,  $p < 0.001$ ).

From an ecological perspective, when unweighted, species tended to occur in overdispersed trait fields, with  $SES$  values that ranged from  $-5.93$  to  $23.98$  (mean  $5.79$ ,  $p < 0.001$ ). However, when abundance was incorporated, most species occurred in ecologically clustered assemblages, with  $SES$  values that ranged from  $-13.95$  to  $15.08$  (mean  $-2.17$ ,  $p < 0.001$ ). In other words, considering only presence and absence across their range, focal species tended to occur with ecologically disparate species. When also incorporating abundance, focal species tended to occur with abundant and ecologically similar species (presumably because there is a trend for ecologically outlying species to be less common than species towards the center of niche space). Additional trait field results, including both unstandardized values and those standardized with the richness null model, are presented in supplementary material.

### *Potential drivers of rates of trait evolution and variation in trait fields*

As noted above, little variation was found in species' rates of trait evolution; these rates were not related to species' phylogenetic fields.

Species' standardized morphological trait fields, however, were closely correlated with their phylogenetic fields. Species from less phylogenetically clustered assemblages tended to occur in assemblages that were less clustered in morphological trait space (unweighted PGLS  $r^2 = 0.20$ ,  $p < 0.001$ ; abundance weighted  $r^2 = 0.49$ ,  $p < 0.001$ ). In

1 contrast, the relationship between species' standardized phylogenetic and ecological trait  
2 fields was only weakly positive (unweighted PGLS  $r^2 = 0.001$ ,  $p = 0.84$ ; abundance  
3 weighted  $r^2 = 0.07$ ,  $p = 0.02$ ). When species' raw (i.e., unstandardized), unweighted  
4 ecological trait fields were compared to their raw, unweighted phylogenetic fields,  
5 species from the most phylogenetically clustered assemblages tended to occur in  
6 assemblages that were the least clustered in ecological trait space (supplementary  
7 material); these species not only tended to be dissimilar from the species they co-occur  
8 with, but they tended to occupy positions on the periphery of ecological space.

9

## 10 DISCUSSION

11 The Meliphagidae, or honeyeaters, are a diverse family of passerines distributed  
12 predominantly in Australia, New Guinea, and the Pacific Islands. They occupy a wide  
13 range of ecological regions, with at least one species occurring almost everywhere in  
14 Australia, including Tasmania, where there are four endemic species. Most species take  
15 some nectar, but some are highly frugivorous, and others are dedicated insectivores  
16 (Higgins et al. 2001). Owing both to ease of observation, and a history of interest in these  
17 species in Australia, their foraging behavior has been studied in some detail (Recher  
18 1971; Ford and Paton 1976a; Paton 1980; Pyke 1980; Ford and Paton 1982; Recher et al.  
19 1985; Ford 1990). These studies laid the foundation upon which this paper is based.

20       Given the diversity of resource acquisition strategies in the honeyeaters, whether  
21 well-defined ecomorphological relationships would emerge from our analysis was  
22 unclear. For instance, the external morphological characters that distinguish small-fruit-  
23 eating passerines from insectivores are not always evident. Moreover, owing to patchy

resources, unpredictable flowering phenology and many short-corolla, generalist-accessible flowers, the Australian honeyeaters are considered uniquely unspecialized in their floral preferences when compared to groups like the hummingbirds (Paton and Ford 1977; Stiles 1981). Despite this, our expectation that morphology predicts ecology in the group was borne out by the phylogenetic canonical correlation analysis (pCCA). Results from the pCCA provide numerous insights into ecomorphological relationships within the honeyeaters, and we briefly discuss a few of these below.

As noted above, honeyeaters are considered unspecialized in their floral preferences (Paton and Ford 1977). After many field hours, however, we knew this to be an overstatement, with certain species like Eastern Spinebill (*Acanthorhynchus tenuirostris*) showing marked bill-flower matching (Fig. 5; indeed, Paton and Ford allude to potentially higher specificity in this and a few other species). Results from the pCCA clearly show a dataset-wide correspondence between the length of species' bills and the flowers they visited. Matching between honeyeaters and particular floral resources extends beyond the "specialized" species like spinebills (pers. obs.), and additional investigation into honeyeater-plant networks is warranted. Nevertheless, the overall degree of matching does appear decidedly lower than that in hummingbirds. Nectar is generally abundant in Australia (Orians and Milewski 2007). For instance, some clearly ornithophilous flowers (e.g., *Grevillea speciosa*, Fig. 5) have distinct slits in the base of the floral tube, rendering nectar readily available to even such short-billed species as Brown-headed Honeyeater (*Melithreptus brevirostris*, pers. obs.). Indeed, the most important nectar resources across Australia are probably the cup-like flowers of *Eucalyptus* (Woinarski et al. 2000).



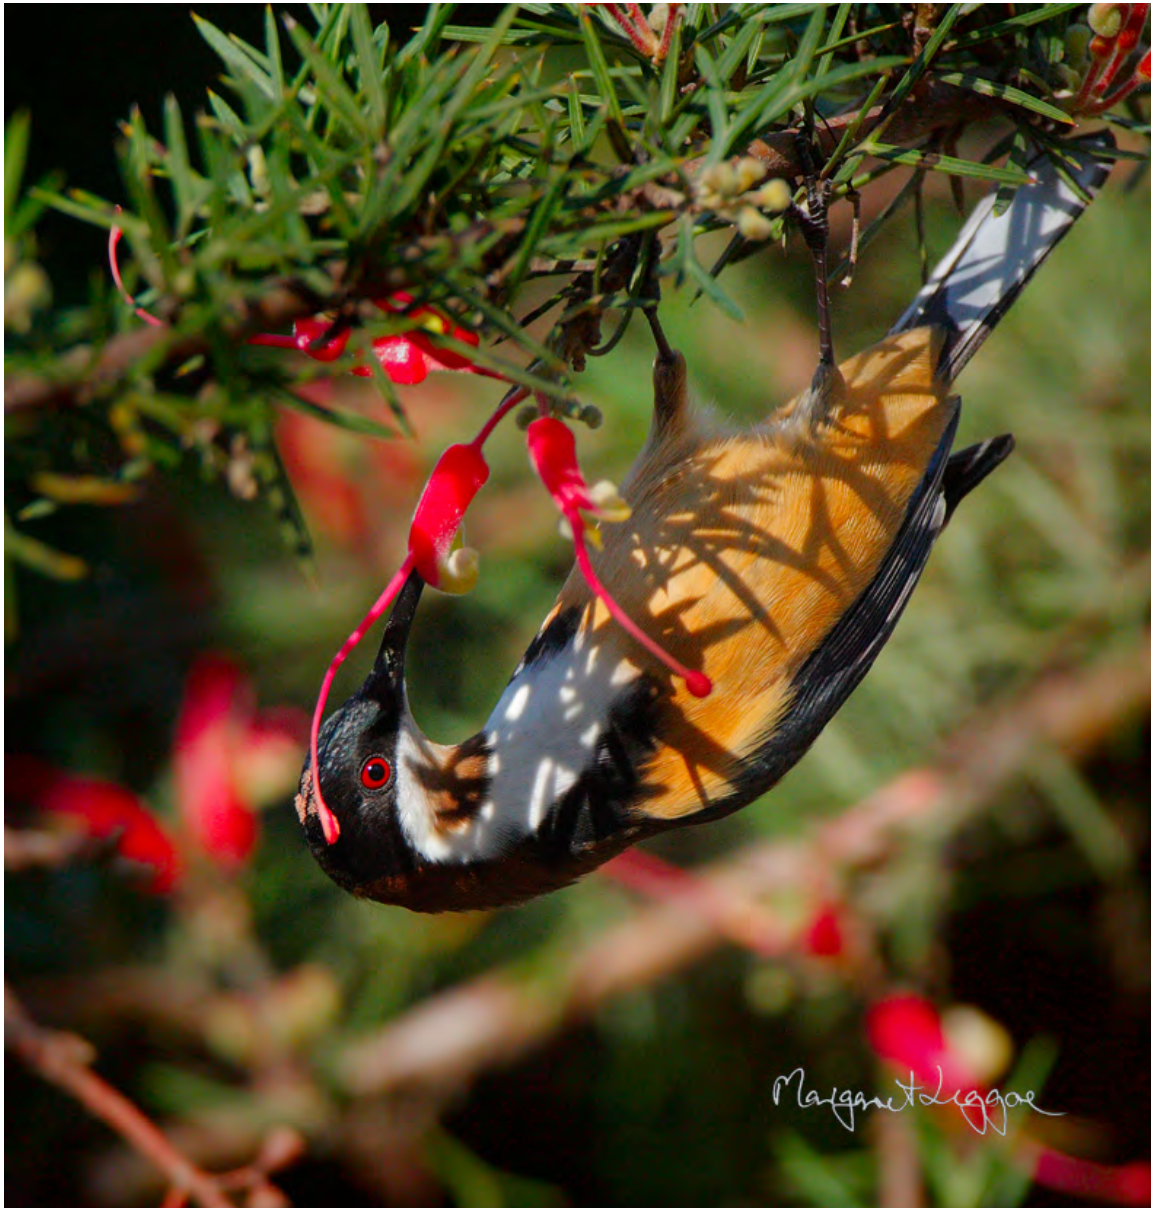

1  
2 Figure 5. An Eastern Spinebill (*Acanthorhynchus tenuirostris*) hangs upside-down to  
3 probe a *Grevillea tripartita tripartita*. Pollen daubed on the spinebill's forehead by the  
4 pollen presenter is clearly visible. Many *Grevillea* species have long tubular corollas and  
5 a clear morphological matching between long-billed honeyeater species like the spinebill  
6 yet, owing to a slit in the floral tube, many species are also readily accessed by short-  
7 billed species like Brown-headed Honeyeater (*Melithreptus brevirostris*). Photo by  
8 Margaret Leggoe.

1

2           Among hummingbirds, long bills are associated with feeding on flowers with long  
3 corollas (Snow and Snow 1980), while among flycatchers long bills are associated with  
4 aerial attacks on invertebrates (Fitzpatrick et al. 2004). Though this may seem like  
5 phenotypic convergence towards dramatically different ecologies, in the honeyeaters, we  
6 found a close relationship between degree of nectarivory, aerial attacks and bill length.  
7 That some of the most nectarivorous honeyeaters regularly “hawk” (make aerial attacks  
8 for flying invertebrates) is well known (Recher and Abbott 1970). Preliminary analyses  
9 suggested such species have a surfeit of calories in the form of nectar, and that these  
10 energetically costly maneuvers are used to rapidly procure protein to supplement their  
11 otherwise protein-poor primary food resource (Ford and Paton 1976b). These studies,  
12 however, were limited to four species. The continental, cross-season, 74-species, dataset-  
13 wide trend found here suggests the existence of a more fundamental dimension of  
14 variation (Westoby et al. 2002), from species that move steadily through foliage, gleaning  
15 invertebrates and occasionally taking some nectar, to those that take much nectar, and  
16 only occasionally perform energetically costly hawking maneuvers in pursuit of protein.  
17 Hummingbirds are also well known to occasionally supplement their diet with flying  
18 invertebrates; indeed, their beaks actually deform to facilitate aerial insect capture  
19 (Yanega and Rubega 2004).

20           The species on the periphery of ecological trait space, those that drove patterns of  
21 assemblage structure, tended to be well-known ecological eccentrics. However, at least  
22 according to our measurements, these species were not notably deviant in morphospace,  
23 and it is with these species that the recovered ecomorphological relationships begin to



break down. Thus, Painted Honeyeater (*Grantiella picta*), a species that foraged on fruit 47% of the time in our data (almost twice as frequently as the next most frugivorous species), resembles Gilbert's Honeyeater (*Melithreptus chloropsis*), a species that was never observed to eat fruit. And chats of *Epthianura* and *Ashbyia*, long considered a separate family due to their idiosyncratic, open-country foraging behavior, differ little in gross morphology from *Conopophila*, *Ramsayornis*, and *Glycichaera*. Finally, the genus *Melithreptus*, including the single largest ecological outlier, Strong-billed Honeyeater (*M. validirostris*), overlaps in morphospace with other genera. Our morphological measures did not capture any aspects of internal morphology (Ricklefs 1996); chats, for instance, have lost most of the bristles on their brush-tipped tongues (Parker 1973). However, even if we had measured such traits, it is likely that some of the recovered ecomorphological relationships are particular to the Australian honeyeaters. Whether such relationships will translate to other avian groups remains to be tested; the family Nectariniidae would be of particular interest in this regard.

Another internal morphological character with clear ecological ramifications is a unique jaw articulation in some species, particularly Strong-billed Honeyeater, other *Melithreptus*, and Black-eared and Yellow-throated Miners (*Manorina melanotis* and *M. flavigula*) (Bock and Morioka 1971). This articulation, concealed in traditionally prepared specimens, was postulated to facilitate raising the maxilla when force was applied to it, allowing the tongue to be moistened with saliva and then extruded from the bill. However, these authors were unsure of the precise use for such morphology, and while they cited Keast (1968), they apparently did not notice his report therein of what we call gaping, i.e., using the bill to pry apart vegetation (Remsen and Robinson 1990) in

Strong-billed Honeyeater. Others have discussed the potential use of this articulation in *Melithreptus* (Willoughby 2005), but in general its behavioral repercussions remain poorly studied. In our dataset, the correlation between the articulation and gaping was quite clear. The species that most frequently employed gaping was Strong-billed Honeyeater. Three other species of *Melithreptus* also used the technique, as did Black-eared and Yellow-throated Miners. However, the sister to *Melithreptus*, Blue-faced Honeyeater (*Entomyzon cyanotis*) also employed gaping occasionally, as did both species of *Stomiopera*, particularly White-gaped Honeyeater (*S. unicolor*). Bock and Morioka (1971) examined jaws of Blue-faced Honeyeater, finding them to be devoid of the articulation, and they also examined an unspecified number of species of *Meliphaga sensu lato* (to which *Stomiopera* used to belong), and similarly found no sign of the jaw gaping morphology. Whether they studied *Stomiopera* skeletons is unclear. It seems likely that careful study of *Stomiopera* will reveal similar jaw articulations to those seen in *Melithreptus* and *Manorina*.

Meliphagidae assemblages are not notably structured in ecological trait space, and ecological space filling does not vary across climatic gradients. This stands in stark contrast to how phylogenetic structure and morphological trait space of Meliphagidae assemblages varies along climatic gradients, where the arid interior is characterized by phylogenetically clustered (Miller et al. 2013) assemblages of morphologically similar honeyeaters. Thus, over evolutionary timescales, over large geographic and climatic spaces, and perhaps in conjunction with shorter time-scale competitive exclusion processes, honeyeaters have diversified to fill comparable local trait spaces in different

1 climatic regions. This is particularly notable when considered in light of the close  
2 phylogenetic relationships among desert species.

3         How did honeyeaters accomplish this impressive filling of trait space? According  
4 to our BAMM analysis, it does not appear that species from phylogenetically clustered  
5 assemblages have systematically evolved any faster through ecological or morphological  
6 trait space. Of course, evolutionary rates are distinct from directions. Species in  
7 phylogenetically clustered assemblages might have exhibited directional evolution away  
8 from potential competitors. Our comparisons of species' phylogenetic fields and their  
9 trait fields provide indirect evidence of this possibility. As one would expect, species'  
10 phylogenetic and morphological trait fields were positively related. That is, species that  
11 occur in the most phylogenetically overdispersed assemblages also occur in the most  
12 morphologically overdispersed assemblages. Yet, this relationship was not manifested  
13 from an ecological perspective. Thus, after accounting for variation in species richness  
14 and for dispersal limitation, species from phylogenetically clustered assemblages are just  
15 as evenly arrayed ecologically as species from much more phylogenetically diverse  
16 assemblages. And, when unstandardized, the relationship between species' ecological  
17 trait and phylogenetic fields was actually strongly negative (supplementary material).  
18 This suggests that despite close phylogenetic relationships and a tendency towards  
19 similar morphologies, the species from arid regions have diverged in ecology to a degree  
20 that they are, on average, as different from their competitors in foraging ecology as are  
21 those species that co-occur in mesic areas.

22         Our results are based on an ecological space that is defined by species' foraging  
23 traits. A potentially more informative approach would define that ecological space *a*

1 *priori*, with independent measures of local resource availability. By simulating  
2 community assembly where the settled species are drawn from ecologically similar sites,  
3 our dispersal null model goes part of the way towards addressing this shortcoming.  
4 Previous ecomorphological studies have included comparatively small numbers of  
5 species (e.g., Saunders and Barclay 1992), phylogenetically disparate/uneven  
6 comparisons (e.g., Douglas and Matthews 1992), single-site comparisons (e.g., Miles and  
7 Ricklefs 1984), and, owing to the difficulty of obtaining quantitative resource-use  
8 measures, fairly gross descriptors of species' ecology (e.g., Pap et al. 2015). We avoided  
9 these issues by examining ecomorphological relationships in a phylogenetic context  
10 across a large clade over continental spatial scales. Our approach is admittedly  
11 confronted by spatio-temporal limitations, and we hope that citizen scientists may  
12 ultimately help to contribute sufficient data to address these questions over even larger  
13 scales.

14       Based on the results shown here, we conclude that species in the arid interior,  
15 those in phylogenetically clustered assemblages, have not evolved any faster through trait  
16 space. Instead, they have diverged from each other so as to partition trait space to an  
17 equivalent degree to that seen in more mesic areas. Morphology predicts ecology in the  
18 Australian Meliphagidae. However, the relationships show marked flexibility. Certain  
19 lineages, like the chats, forage in radically different ways from their relatives, exploiting  
20 entirely divergent resources with fairly conserved morphologies. Thus, community  
21 assembly and trait diversification in the honeyeaters reflects a combination of adaptation,  
22 both to local habitats and to competitors, and constraint as a result of past evolutionary  
23 history.

1

## 2 ACKNOWLEDGEMENTS

3 ETM is grateful for financial support from the National Science Foundation, the St. Louis  
4 Audubon Society, a Trans-World Airlines Scholarship from the University of Missouri,  
5 and Macquarie University Higher Degree Research Office. We thank Leo Joseph, Árpád  
6 Nyári, Alicia Toon, Brian Venebles, Stephen Murphy, Hugh Ford, Harry Recher, Phillip  
7 Maher, Mick Roderick, Dick Cooper, David Watson, Keith and Lindsay Fisher, Alex  
8 Anderson, Bryan Suson, Josef Uyeda, Mark Westoby and Amy Zanne for invaluable  
9 discussion and advice on study sites, identification tips, and help in the field. We thank  
10 the FMNH, John Bates and Dave Willard, the AMNH, Paul Sweet, Santiago Claramunt  
11 and Joel Cracraft, the Burke Museum and Rob Faucett, and the Australian Museum,  
12 Walter Boles and Jaynia Sladek, for facilitating study at those institutions. We thank  
13 Margaret Leggoe for permission to use the photograph of the spinebill.

14

## 15 LITERATURE CITED

16 Adams, D. C. 2014. A generalized K statistic for estimating phylogenetic signal from  
17 shape and other high-dimensional multivariate data. *Systematic Biology* 63:685–697.  
18 Allen, J. A. 1877. The influence of physical conditions in the genesis of species. *Radical*  
19 *Review* 1:108–140.  
20 Arnold, S. J. 1992. Constraints on phenotypic evolution. *The American Naturalist*  
21 140:S85–S107.  
22 Blomberg, S. P., T. Garland Jr, and A. R. Ives. 2003. Testing for phylogenetic signal in  
23 comparative data: behavioral traits are more labile. *Evolution* 717–745.

- 1 Bock, W. J., and H. Morioka. 1971. Morphology and evolution of the ectethmoid-  
2 mandibular articulation in the Meliphagidae (Aves). *Journal of Morphology* 135:13–50.
- 3 Claramunt, S., E. P. Derryberry, J. V. Remsen, and R. T. Brumfield. 2012. High dispersal  
4 ability inhibits speciation in a continental radiation of passerine birds. *Proceedings of the*  
5 *Royal Society of London B: Biological Sciences* 279:1567–1574.
- 6 Cornwell, W. K., D. W. Schilck, and D. D. Ackerly. 2006. A trait-based test for habitat  
7 filtering: Convex hull volume. *Ecology* 87:1465–1471.
- 8 Darwin, C. 1859. *On the origin of species by means of natural selection, or the*  
9 *preservation of favoured races in the struggle for life*. John Murray, London.
- 10 Dehling, D. M., S. A. Fritz, T. Töpfer, M. Päckert, P. Estler, K. Böhning-Gaese, and M.  
11 Schleuning. 2014. Functional and phylogenetic diversity and assemblage structure of  
12 frugivorous birds along an elevational gradient in the tropical Andes. *Ecography*  
13 37:1047–1055.
- 14 Douglas, M. E., and W. J. Matthews. 1992. Does morphology predict ecology?  
15 Hypothesis testing within a freshwater stream fish assemblage. *Oikos* 213–224.
- 16 Fitzpatrick, J. W., J. M. Bates, K. S. Bostwick, I. C. Caballero, B. M. Clock, A.  
17 Farnsworth, P. A. Hosner, et al. 2004. Family Tyrannidae (Tyrant-Flycatchers). Pages  
18 170–462 *in* *Handbook of the Birds of the World (Vol. 9)*. Lynx Editions, Barcelona.
- 19 Ford, H. A. 1990. Relationships between distribution, abundance and foraging  
20 specialization in Australian landbirds. *Ornis Scandinavica* 133–138.
- 21 Ford, H. A., and D. C. Paton. 1976a. Resource partitioning and competition in  
22 honeyeaters of the genus *Meliphaga*. *Australian Journal of Ecology* 1:281–287.
- 23 ———. 1976b. The value of insects and nectar to honeyeaters. *Emu* 76:83–84.

- 1 ———. 1982. Partitioning of nectar sources in an Australian honeyeater community.  
2 Australian Journal of Ecology 7:149–159.
- 3 Futuyma, D. J. 2010. Evolutionary constraint and ecological consequences. Evolution  
4 64:1865–1884.
- 5 Givnish, T. J. 2015. Adaptive radiation versus “radiation” and “explosive  
6 diversification”: why conceptual distinctions are fundamental to understanding evolution.  
7 New Phytologist 207:297–303.
- 8 Givnish, T. J., and K. J. Sytsma. 2000. Molecular evolution and adaptive radiation.  
9 Cambridge University Press, Cambridge.
- 10 Gómez, J. P., G. A. Bravo, R. T. Brumfield, J. G. Tello, and C. D. Cadena. 2010. A  
11 phylogenetic approach to disentangling the role of competition and habitat filtering in  
12 community assembly of Neotropical forest birds. Journal of Animal Ecology 79:1181–  
13 1192.
- 14 Hansen, T. F., and D. Houle. 2008. Measuring and comparing evolvability and constraint  
15 in multivariate characters. Journal of Evolutionary Biology 21:1201–1219.
- 16 Higgins, P. J., J. M. Peter, and W. K. Steele. 2001. Handbook of Australian, New  
17 Zealand and Antarctic Birds. Vol. 5: Tyrant-flycatchers to Chats. Oxford University  
18 Press, Melbourne, Australia.
- 19 Joseph, L., A. Toon, Á. S. Nyári, N. W. Longmore, K. Rowe, T. Haryoko, J. Trueman, et  
20 al. 2014. A new synthesis of the molecular systematics and biogeography of honeyeaters  
21 (Passeriformes: Meliphagidae) highlights biogeographical and ecological complexity of a  
22 spectacular avian radiation. Zoologica Scripta 43:235–248.

- 1 Karr, J. R., and F. C. James. 1975. Ecomorphological configurations and convergent  
2 evolution in species and communities. Pages 258–291 in M. L. Cody and J. M. Diamond,  
3 eds. Ecology and evolution of communities. Belknap Press, Cambridge, Massachusetts.
- 4 Keast, A. 1968. Competitive Interactions and the Evolution of Ecological Niches as  
5 Illustrated by the Australian Honeyeater Genus *Melithreptus* (Meliphagidae). *Evolution*  
6 22:762–784.
- 7 Keast, A., and H. F. Recher. 1997. The adaptive zone of the genus *Gerygone*  
8 (*Acanthizidae*) as shown by morphology and feeding habits. *Emu* 97:1–17.
- 9 Kraft, N. J. B., and D. D. Ackerly. 2010. Functional trait and phylogenetic tests of  
10 community assembly across spatial scales in an Amazonian forest. *Ecological*  
11 *Monographs* 80:401–422.
- 12 Lambers, H., and H. Poorter. 2004. Inherent variation in growth rate between higher  
13 plants: a search for physiological causes and ecological consequences. *Advances in*  
14 *Ecological Research* 34:283–362.
- 15 Latham, R. E., and R. E. Ricklefs. 1993. Global patterns of tree species richness in moist  
16 forests: energy-diversity theory does not account for variation in species richness. *Oikos*  
17 67:325–333.
- 18 Leisler, B., and K. Schulze-Hagen. 2011. The reed warblers: diversity in a uniform bird  
19 family. KNNV Uitgeverij, Zeist, Netherlands.
- 20 Lovette, I. J., and R. T. Holmes. 1995. Foraging behavior of American Redstarts in  
21 breeding and wintering habitats: implications for relative food availability. *Condor* 782–  
22 791.



- 1 Luther, D. 2009. The influence of the acoustic community on songs of birds in a  
2 neotropical rain forest. *Behavioral Ecology* 20:864–871.
- 3 Mast, A. R., P. M. Olde, R. O. Makinson, E. Jones, A. Kubes, E. T. Miller, and P. H.  
4 Weston. 2015. Paraphyly changes understanding of timing and tempo of diversification  
5 in subtribe Hakeinae (Proteaceae), a giant Australian plant radiation. *American Journal of*  
6 *Botany Online Early*.
- 7 McGill, B. J., B. J. Enquist, E. Weiher, and M. Westoby. 2006. Rebuilding community  
8 ecology from functional traits. *Trends in Ecology & Evolution* 21:178–185.
- 9 Miles, D. B., and R. E. Ricklefs. 1984. The correlation between ecology and morphology  
10 in deciduous forest Passerine birds. *Ecology* 65:1629–1640.
- 11 Miles, D. B., R. E. Ricklefs, and J. Travis. 1987. Concordance of ecomorphological  
12 relationships in three assemblages of passerine birds. *American Naturalist* 129:347–364.
- 13 Miller, E. T., D. R. Farine, and C. H. Trisos. 2015. Phylogenetic community structure  
14 metrics and null models: a review with new methods and software. *bioRxiv* 025726.
- 15 Miller, E. T., and S. K. Wagner. 2014. The ecology of the Australian sandstone  
16 *Meliphaga* honeyeater species. *Australian Field Ornithology* In press.
- 17 Miller, E. T., A. E. Zanne, and R. E. Ricklefs. 2013. Niche conservatism constrains  
18 Australian honeyeater assemblages in stressful environments. *Ecology Letters* 16:1186–  
19 1194.
- 20 Orians, G. H., and A. V. Milewski. 2007. Ecology of Australia: the effects of nutrient-  
21 poor soils and intense fires. *Biological Reviews* 82:393–423.

1 Pap, P. L., G. Osváth, K. Sándor, O. Vincze, L. Bărbos, A. Marton, R. L. Nudds, et al.  
2 2015. Interspecific variation in the structural properties of flight feathers in birds  
3 indicates adaptation to flight requirements and habitat. *Functional Ecology* 29:746–757.  
4 Parker, S. A. 1973. The tongues of Ephthianura and Ashbyia. *Emu* 73:19–20.  
5 Paton, D. C. 1980. The importance of manna, honeydew and lerp in the diets of  
6 honeyeaters. *Emu* 80:213–226.  
7 Paton, D. C., and H. A. Ford. 1977. Pollination by birds of native plants in South  
8 Australia. *Emu* 77:73–85.  
9 Pyke, G. H. 1980. The foraging behaviour of Australian honeyeaters: a review and some  
10 comparisons with hummingbirds. *Australian Journal of Ecology* 5:343–369.  
11 Rabosky, D. L. 2014. Automatic Detection of Key Innovations, Rate Shifts, and  
12 Diversity-Dependence on Phylogenetic Trees. *PLoS ONE* 9:e89543.  
13 Rabosky, D. L., M. Grundler, C. Anderson, P. Title, J. J. Shi, J. W. Brown, H. Huang, et  
14 al. 2014. BAMMtools: an R package for the analysis of evolutionary dynamics on  
15 phylogenetic trees. *Methods in Ecology and Evolution* 5:701–707.  
16 R Development Core Team. 2011. R: A language and environment for statistical  
17 computing. R Foundation for Statistical Computing, Vienna, Austria, [http://www.R-](http://www.R-project.org)  
18 [project.org](http://www.R-project.org).  
19 Recher, H. F. 1971. Sharing of habitat by three congeneric honeyeaters. *Emu* 71:147–  
20 152.  
21 Recher, H. F., and I. J. Abbott. 1970. The possible ecological significance of hawking by  
22 honeyeaters and its relation to nectar feeding. *Emu* 70:90–90.

- 1 Recher, H. F., R. T. Holmes, M. Schulz, J. Shields, and R. Kavanagh. 1985. Foraging  
2 patterns of breeding birds in eucalypt forest and woodland of southeastern Australia.  
3 Australian Journal of Ecology 10:399–419.
- 4 Remsen, J. V., and S. K. Robinson. 1990. A classification scheme for foraging behavior  
5 of birds in terrestrial habitats. Studies in Avian Biology 13:144–160.
- 6 Revell, L. J. 2009. Size-correction and principal components for interspecific  
7 comparative studies. Evolution 63:3258–3268.
- 8 ———. 2012. phytools: an R package for phylogenetic comparative biology (and other  
9 things). Methods in Ecology and Evolution 3:217–223.
- 10 Revell, L. J., and A. S. Harrison. 2008. PCCA: A program for phylogenetic canonical  
11 correlation analysis. Bioinformatics 24:1018–1020.
- 12 Ricklefs, R. E. 1996. Morphometry of the digestive tracts of some passerine birds.  
13 Condor 98:279–292.
- 14 Ricklefs, R. E. 2011. Applying a regional community concept to forest birds of eastern  
15 North America. Proceedings of the National Academy of Sciences 108:2300–2305.
- 16 Ricklefs, R. E. 2012. Species richness and morphological diversity of passerine birds.  
17 Proceedings of the National Academy of Sciences 109:14482–14487.
- 18 Ricklefs, R. E., and D. B. Miles. 1994. Ecological and evolutionary inferences from  
19 morphology: an ecological perspective. Pages 13–41 *in* Ecological morphology:  
20 integrative organismal biology, P.C. Wainwright & S.M. Reilly (eds.). University of  
21 Chicago Press, Chicago.
- 22 Ricklefs, R. E., and J. Travis. 1980. A morphological approach to the study of avian  
23 community organization. Auk 97:321–338.

- 1 Rico-Guevara, A., and M. Araya-Salas. 2014. Bills as daggers? A test for sexually
- 2 dimorphic weapons in a lekking hummingbird. *Behavioral Ecology* 21:29.
- 3 Saunders, M. B., and R. M. R. Barclay. 1992. Ecomorphology of insectivorous bats: a
- 4 test of predictions using two morphologically similar species. *Ecology* 73:1335–1345.
- 5 Schluter, D. 1996. Adaptive radiation along genetic lines of least resistance. *Evolution*
- 6 50:1766–1774.
- 7 ———. 2000. *The ecology of adaptive radiation*. Oxford University Press, New York.
- 8 Schneider, C. A., W. S. Rasband, and K. W. Eliceiri. 2012. NIH Image to ImageJ: 25
- 9 years of image analysis. *Nat Meth* 9:671–675.
- 10 Snow, D. W., and B. K. Snow. 1980. Relationships between hummingbirds and flowers
- 11 in the Andes of Columbia. *Bulletin of the British Museum of Natural History* 38:105–
- 12 139.
- 13 Stayton, C. T. 2015. The definition, recognition, and interpretation of convergent
- 14 evolution, and two new measures for quantifying and assessing the significance of
- 15 convergence. *Evolution*.
- 16 Stewart, D., and W. Love. 1968. A general canonical correlation index. *Psychological*
- 17 *Bulletin* 70:160–163.
- 18 Stiles, F. G. 1981. *Geographical Aspects of Bird-Flower Coevolution, with Particular*
- 19 *Reference to Central America*. *Annals of the Missouri Botanical Garden* 68:323–351.
- 20 Sullivan, B. L., C. L. Wood, M. J. Iliff, R. E. Bonney, D. Fink, and S. Kelling. 2009.
- 21 eBird: A citizen-based bird observation network in the biological sciences. *Biological*
- 22 *Conservation* 142:2282–2292.

- 1 Suryan, R. M., D. B. Irons, and J. Benson. 2000. Prey switching and variable foraging  
2 strategies of Black-legged Kittiwakes and the effect on reproductive success. *Condor*  
3 102:374–384.
- 4 Symonds, M. R., and G. J. Tattersall. 2010. Geographical variation in bill size across bird  
5 species provides evidence for Allen’s rule. *The American Naturalist* 176:188–197.
- 6 Tilman, D. 1988. Plant strategies and the dynamics and structure of plant communities.  
7 Princeton University Press, Princeton, NJ.
- 8 Tobias, J. A., R. Planqué, D. L. Cram, and N. Seddon. 2014. Species interactions and the  
9 structure of complex communication networks. *Proceedings of the National Academy of*  
10 *Sciences* 111:1020–1025.
- 11 Toon, A., J. M. Hughes, and L. Joseph. 2010. Multilocus analysis of honeyeaters (Aves:  
12 Meliphagidae) highlights spatio-temporal heterogeneity in the influence of biogeographic  
13 barriers in the Australian monsoonal zone. *Molecular Ecology* 19:2980–2994.
- 14 Villalobos, F., T. F. Rangel, and J. A. F. Diniz-Filho. 2013. Phylogenetic fields of  
15 species: cross-species patterns of phylogenetic structure and geographical coexistence.  
16 *Proceedings of the Royal Society B: Biological Sciences* 280:20122570.
- 17 Wainwright, P. C. 2007. Functional versus morphological diversity in macroevolution.  
18 *Annual Review of Ecology, Evolution, and Systematics* 38:381–401.
- 19 Webb, C. O., D. D. Ackerly, M. A. McPeck, and M. J. Donoghue. 2002. Phylogenies and  
20 community ecology. *Annual Review of Ecology and Systematics* 33:475–505.
- 21 Westoby, M., D. S. Falster, A. T. Moles, P. A. Vesk, and I. J. Wright. 2002. Plant  
22 ecological strategies: some leading dimensions of variation between species. *Annual*  
23 *Review of Ecology, Evolution, and Systematics* 33:125–159.

- 1 Wiens, J. J., and M. J. Donoghue. 2004. Historical biogeography, ecology and species
- 2 richness. *Trends in Ecology & Evolution* 19:639–644.
- 3 Willoughby, N. 2005. *Comparative ecology, and conservation, of the Melithreptus genus*
- 4 *in the Southern Mount Lofty Ranges, South Australia* (B.Sc., Hons). University of
- 5 Adelaide.
- 6 Woinarski, J. C. Z., G. Connors, and D. C. Franklin. 2000. Thinking honeyeater: nectar
- 7 maps for the Northern Territory, Australia. *Pacific Conservation Biology* 6:61–80.
- 8 Wright, I. J., P. B. Reich, M. Westoby, D. D. Ackerly, Z. Baruch, F. Bongers, J.
- 9 Cavender-Bares, et al. 2004. The worldwide leaf economics spectrum. *Nature* 428:821–
- 10 827.
- 11 Yanega, G. M., and M. A. Rubega. 2004. Feeding mechanisms: Hummingbird jaw bends
- 12 to aid insect capture. *Nature* 428:615–615.
- 13
- 14 Table 1. Canonical correlations, chi-square values and significance of the correlations for
- 15 the 15 dimensions from the phylogenetic canonical correlation analysis comparing
- 16 Meliphagidae ecology and morphology.

| Dimension | Canonical correlation | Chi-square | p-value |
|-----------|-----------------------|------------|---------|
| 1         | 0.97                  | 695.73     | < 0.001 |
| 2         | 0.93                  | 549.28     | < 0.001 |
| 3         | 0.89                  | 453.17     | < 0.001 |
| 4         | 0.89                  | 374.85     | 0.01    |

|    |      |        |      |
|----|------|--------|------|
| 5  | 0.82 | 298.04 | 0.16 |
| 6  | 0.80 | 242.21 | 0.45 |
| 7  | 0.77 | 190.98 | 0.78 |
| 8  | 0.71 | 146.27 | 0.95 |
| 9  | 0.68 | 111.48 | 0.99 |
| 10 | 0.67 | 81.32  | 1.00 |
| 11 | 0.59 | 52.26  | 1.00 |
| 12 | 0.49 | 30.90  | 1.00 |
| 13 | 0.46 | 17.36  | 1.00 |
| 14 | 0.27 | 5.32   | 1.00 |
| 15 | 0.17 | 1.51   | 1.00 |

1

2 Table 2. Summary of the phylogenetic correlations of the morphological variables with  
3 the morphological canonical correlates (dimensions) and the ecological variables with the  
4 ecological canonical correlates (from the phylogenetic canonical correlation analysis).

5

|                         | Dimension 1 | Dimension 2 | Dimension 3 | Dimension 4 |
|-------------------------|-------------|-------------|-------------|-------------|
| Morphological variables |             |             |             |             |
| Tarsus length           | -0.62       | -0.41       | -0.04       | -0.29       |
| Mass                    | -0.55       | -0.30       | -0.13       | -0.26       |
| Bill width at<br>nares  | -0.54       | -0.11       | -0.12       | -0.16       |
| Hindtoe                 | -0.52       | -0.28       | 0.05        | -0.31       |



|                             |       |       |       |       |
|-----------------------------|-------|-------|-------|-------|
| length                      |       |       |       |       |
| Bill depth at nares         | -0.51 | -0.22 | -0.27 | -0.21 |
| Midtoe length               | -0.47 | -0.35 | 0.04  | -0.29 |
| Primary wing feather length | -0.47 | -0.25 | -0.04 | -0.27 |
| Total length                | -0.46 | -0.42 | 0.00  | -0.42 |
| Tail length                 | -0.41 | -0.39 | -0.05 | -0.52 |
| Length index                | -0.20 | 0.14  | -0.14 | -0.34 |
| Bill length nares to tip    | -0.14 | -0.62 | -0.08 | -0.07 |
| Depth index                 | -0.07 | 0.20  | 0.36  | 0.23  |
| Width index                 | 0.08  | -0.26 | -0.13 | 0.01  |
| Wing index                  | 0.37  | 0.29  | -0.05 | -0.35 |
| Bill curvature              | 0.54  | -0.32 | -0.14 | 0.16  |
| Ecological variables        |       |       |       |       |
| Gleaning                    | -0.61 | 0.46  | 0.13  | -0.01 |
| Ground                      | -0.51 | -0.02 | 0.09  | 0.49  |
| Sally pouncing              | -0.39 | -0.19 | -0.06 | 0.06  |
| Branches                    | -0.38 | 0.22  | 0.22  | -0.52 |
| Pecking                     | -0.36 | 0.03  | -0.11 | 0.42  |
| Reaching                    | -0.33 | 0.07  | -0.19 | -0.15 |
| Leaves                      | -0.29 | 0.32  | 0.04  | -0.05 |

|                        |       |       |       |       |
|------------------------|-------|-------|-------|-------|
| Dead substrates        | -0.29 | -0.05 | -0.05 | 0.14  |
| Sally gliding          | -0.27 | -0.17 | 0.29  | -0.18 |
| Lunging                | -0.20 | 0.09  | 0.00  | 0.10  |
| Sally stalling         | -0.19 | -0.16 | -0.15 | -0.02 |
| Gaping                 | -0.18 | 0.09  | -0.14 | -0.04 |
| Hanging bark           | -0.16 | 0.25  | -0.30 | -0.24 |
| Pulling                | -0.16 | 0.28  | -0.07 | -0.25 |
| Insect cases           | -0.13 | 0.22  | 0.18  | -0.05 |
| Mean attack height     | -0.05 | 0.32  | -0.28 | -0.04 |
| Hanging                | -0.01 | 0.70  | -0.12 | -0.31 |
| Frugivory              | 0.00  | 0.11  | -0.24 | 0.11  |
| Flutter chasing        | 0.07  | 0.18  | 0.11  | 0.13  |
| Distance from trunk    | 0.09  | 0.05  | 0.10  | 0.33  |
| Flower length          | 0.10  | -0.44 | 0.08  | -0.36 |
| Webs                   | 0.15  | 0.32  | 0.00  | 0.09  |
| Foliage density        | 0.22  | 0.02  | -0.08 | -0.18 |
| Sally hovering         | 0.22  | 0.04  | 0.14  | 0.20  |
| Air                    | 0.43  | -0.35 | -0.04 | -0.01 |
| Relative canopy height | 0.45  | 0.21  | 0.12  | -0.32 |
| Sally striking         | 0.52  | -0.38 | -0.18 | -0.03 |
| Probing                | 0.55  | -0.39 | -0.10 | -0.06 |

|             |      |       |       |      |
|-------------|------|-------|-------|------|
| Nectarivory | 0.66 | -0.43 | -0.13 | 0.12 |
|-------------|------|-------|-------|------|

1

## Supplementary Material – Honeyeater ecomorphology and competition

### 1 *Hand-wing index and aspect ratio*

2 The aspect ratio of a wing is the ratio of its span (length) to its breadth (width). In other  
 3 words, it is a measure of wing shape; higher aspect ratio relates to increasingly long, thin  
 4 wings. The hand-wing index (Claramunt et al. 2012) is a proxy for aspect ratio, and is a  
 5 composite of two measures that can be taken on traditionally prepared birds. The  
 6 appropriate secondary wing feather to measure is the outermost secondary. On our  
 7 traditionally prepared specimens, we inadvertently measured the length of the longest  
 8 secondary. Thus, we used our spread wing measures to confirm that the bias from this  
 9 mistake was small. Across all traditional specimens for which we had corresponding  
 10 spread wings, the  $r^2$  between the longest and outermost secondary wing feathers was 0.99  
 11 ( $n = 42$ ). That is because these are generally the same feathers, and we therefore used the  
 12 measured longest secondary feather to calculate a hand-wing index as in Claramunt et al.  
 13 (2012).

14 To confirm that this index was meaningful in Meliphagidae, we calculated aspect  
 15 ratio using the root box method (Pennycuick 2008). For this, we assumed that the height  
 16 (perpendicular to the axis of wing) of the root box was equal to the width of the wing (as  
 17 measured from ImageJ), and that the width of the box (parallel to axis of wing) was equal  
 18 to the wingspan minus two times the length of the wing. Because this measure relied on a  
 19 number of assumptions, we derived an alternative measure of aspect ratio as the squared  
 20 length of the folded primary divided by the wing area (from ImageJ). Both measures  
 21 were significantly correlated with the hand-wing index (aspect ratio  $r^2 = 0.29$ ,  $p < 0.001$ ,  
 22  $n = 64$ ; alternative measure  $r^2 = 0.41$ ,  $p < 0.001$ ,  $n = 69$ ). We therefore used the index as

## Supplementary Material – Honeyeater ecomorphology and competition

our measure of wing shape, and did not use measures from the spread wing specimens for any additional analyses.

### *Additional details on foraging substrate, maneuver, foliage density and distance from the trunk*

We recognized 17 mutually exclusive foraging maneuvers (or attacks). In order from most to least frequently observed, these were: probe, glean, sally-strike, sally-hover, flutter-chase, sally-stall, sally-pounce, gape, lunge, peck, sally-glide, flush-pursue, pull, screen, flake, hammer and leap. Definitions of these attacks follow Remsen and Robinson (1990).

We recognized 10 mutually exclusive foraging substrates. In order from most to least frequently observed, these were: flower, leaf, branch, air, ground, fruit, insect case (e.g., Psychidae larvae), web (e.g., picking spiders or their prey out of their webs, or picking caterpillars out of tents), hanging bark, and woody fruit (e.g., *Banksia* cones or *Eucalyptus* capsules).

We recorded foliage density on an ordinal scale, from 0-5. We estimated this density based on a 1-m-diameter sphere centered on the foraging attack site. A zero indicated that 0% of the light passing through that sphere would be blocked, while a five indicated that 100% would be blocked.

We also recorded the distance of the foraging attack from the trunk on an ordinal scale, from 1-4. If the bird was on the trunk we considered it a 1. If the bird was foraging in the middle of the canopy or, for instance, within a hedge of overlapping bushes, we considered it a 2. If the bird was foraging towards the twig tips or just beyond them, for

## Supplementary Material – Honeyeater ecomorphology and competition

instance hanging from branch tips or sally-striking for insects just beyond the canopy, we considered it a 3. Finally, if the bird was foraging far out in the open, for instance in an open gibber (gravel) expanse or sally-striking for insects far above the canopy, we considered it a 4.

### *Introduction to the morphological dataset*

The morphological dataset contains measures for 74 of 75 Australian species. We were not able to obtain measures for Eungella Honeyeater (*Bolemoreus hindwoodi*). We included 15 measures in the dataset (Fig. S1-2). (1) Bill length nares to tip is the linear distance in millimeters measured from the distal edge of the nares to the tip of the bill. We also measured bill length from the functional hinge (the base) of the bill to its tip. Thus, (2) length index is defined as:

$$100 \times \frac{\text{bill length base to tip} - \text{bill length nares to tip}}{\text{bill length base to tip}}$$

(3) Bill width at the nares is the linear distance in millimeters measured over the under mandible and spanning the distal edge of the nares. (4) The width index is defined as the length index, except that length base to tip and length nares to tip are replaced by width at the base and width at the nares, respectively. (5) Bill depth at the nares is the linear distance spanning the upper and lower mandibles over the distal edge of the nares. (6) Depth index is defined as the width index, except using depth at the base and at the nares of the bill. (7) Bill curvature is defined as the quotient of the length of the upper mandible as measured along its edge in ImageJ over the chord of the bill (also from ImageJ). (8)

## Supplementary Material – Honeyeater ecomorphology and competition

1 Primary length is the length in millimeters of the longest primary wing feather as  
2 measured with a wing ruler on a traditionally prepared specimen. (9) Tail length is the  
3 length in millimeters as measured with a wing ruler pressed up against the crissum of the  
4 bird. (10) Tarsus length is the length in millimeters along the tarsus as measured from the  
5 tibiotarsal articulation to the base of the toes. (11) Midtoe length is the length in  
6 millimeters as measured from the base of the toe to its tip/the start of the nail. Because  
7 this toe is often bent in specimens, this was often measured in two or three segments,  
8 summing each for a final midtoe length. (12) Hindtoe length is the length in millimeters  
9 as measured from the base of the toe to its tip. (13) Total length is the length in  
10 millimeters of the entire bird, from the tip of the bill to the tip of the tail. (14) Mass is  
11 presented in grams, and is either taken directly from specimens tags or inferred as  
12 detailed in the main text. (15) The wing index is calculated like the length index, only  
13 instead of bill length from base to tip and from nares to tip, primary and secondary wing  
14 lengths, respectively, are used (with the caveat explained in *Hand-wing index and aspect*  
15 *ratio* above).  
16



# Supplementary Material – Honeyeater ecomorphology and competition

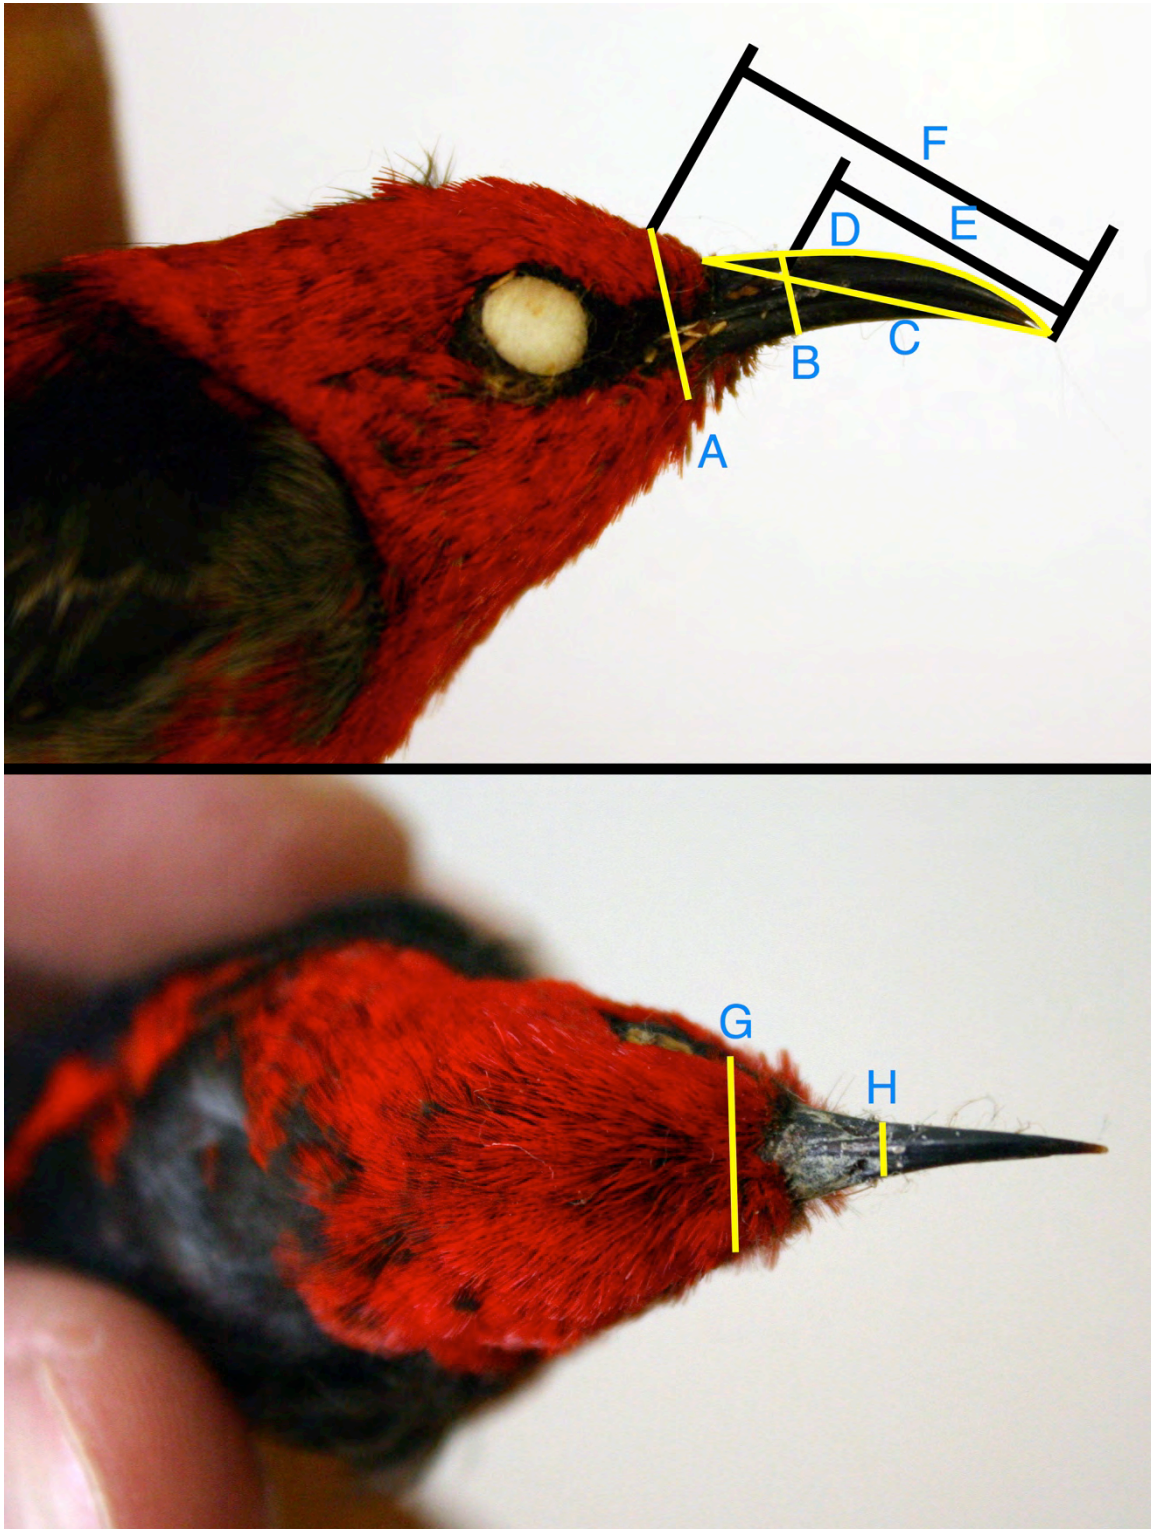

1

2

## Supplementary Material – Honeyeater ecomorphology and competition

- 1 Figure S1. The linear bill measurements recorded in this study, as illustrated on a male
- 2 Scarlet Myzomela (*Myzomela sanguinolenta*). The measurements are: (A) bill depth at
- 3 the kinetic hinge, (B) bill depth at the nares, (C) bill chord length, (D) maxilla length, (E)
- 4 bill length from the nares, (F) bill length from the kinetic hinge, (G) bill width at the
- 5 kinetic hinge, and (H) bill width at the nares.
- 6



# Supplementary Material – Honeyeater ecomorphology and competition

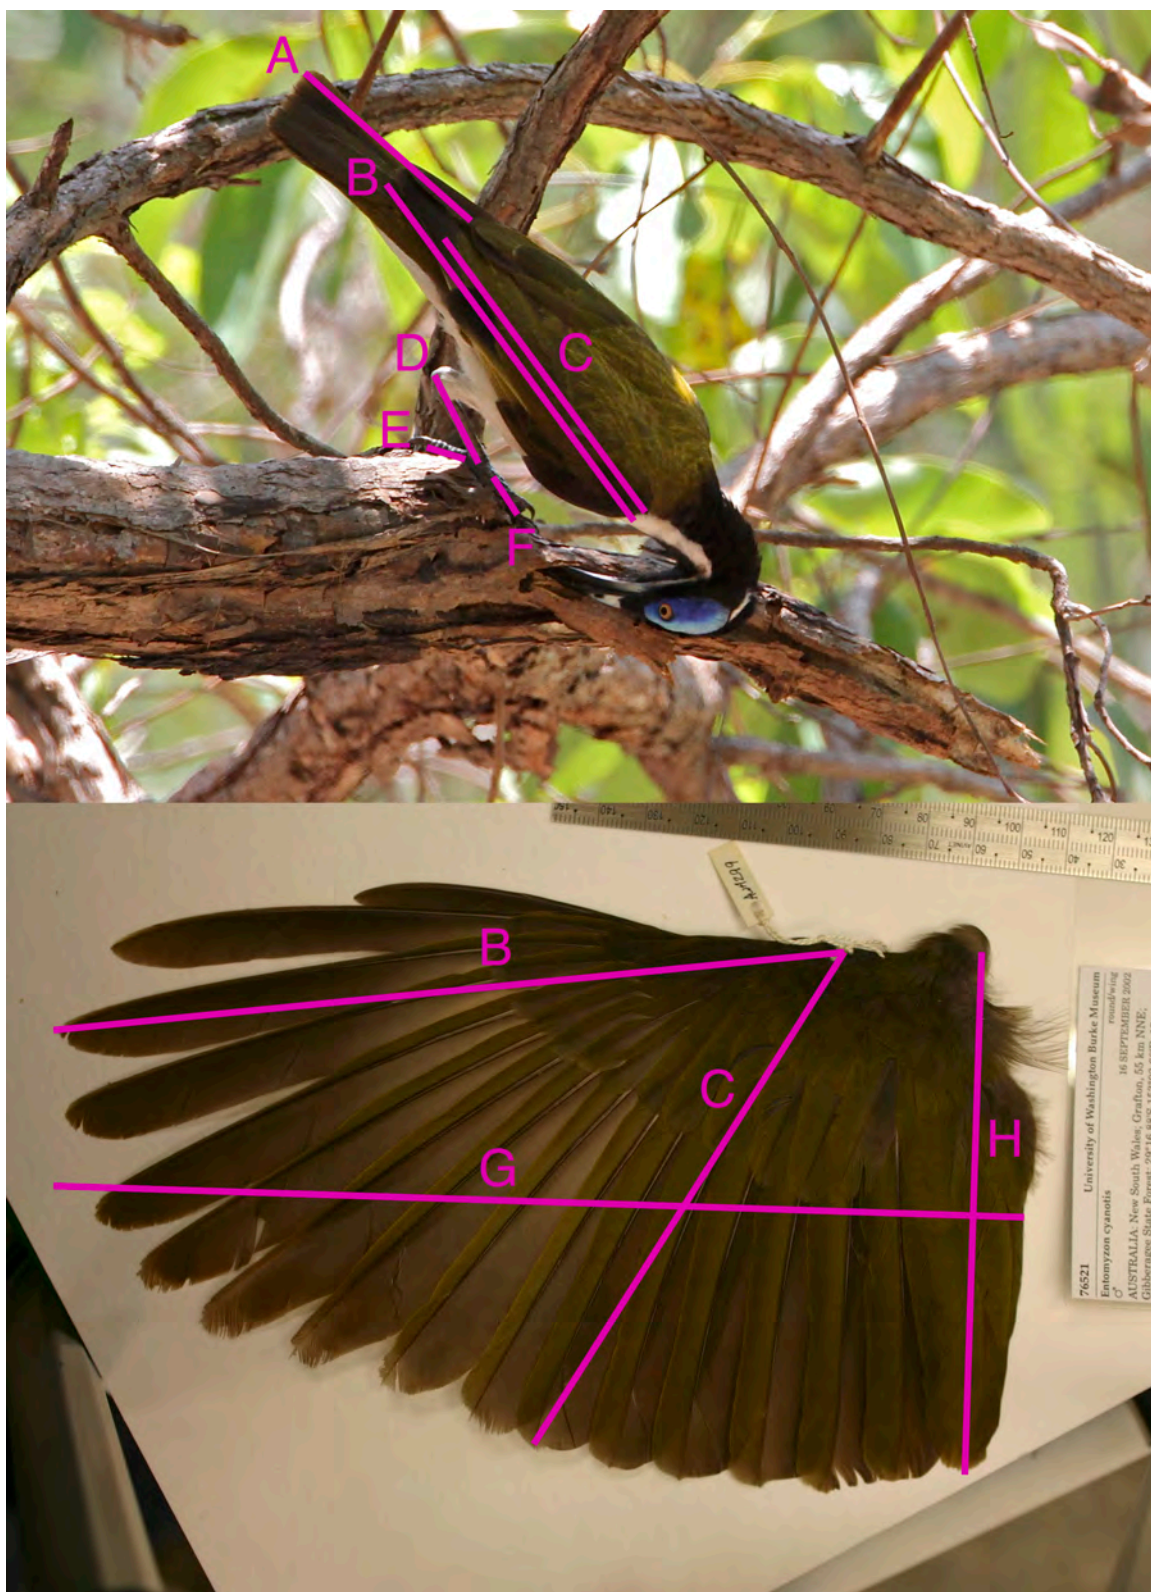

1

2

## Supplementary Material – Honeyeater ecomorphology and competition

Figure S2. The linear wing, leg and foot measurements taken in this study, as illustrated on a live Blue-faced Honeyeater (*Entomyzon cyanotis*) shown hanging down to probe a dead branch (photo by Bryan Suson) and a prepared Blue-faced Honeyeater spread wing specimen from the Burke Museum. The measurements are: (A) tail length, (B) primary wing length, (C) secondary wing length, (D) tarsus length, (E) hindtoe length, (F) midtoe length, (G) wing length along axis of wing, and (H) wing width perpendicular to axis of wing.

### Introduction to the ecological dataset

The ecological dataset contains measures for 74 of 75 Australian species. We were not able to obtain sufficient observations for Gray Honeyeater (*Conopophila whitei*) to justify inclusion here. The 30 measures included in the main text are presented, as are the number of independent observations per species (i.e., serial observations on a single individual only count as a single observation here). For each foraging observation we recorded the height at which the attack occurred. Average foraging height per species is presented here. For each attack, we also recorded relative attack height. Here, the height of the attack was divided by the average canopy height in a 2 m diameter circle around the attack site; because it was possible for attacks to be above the average canopy height, extreme relative attack height values were rounded down to 1.1. We present the mean relative attack height per species here, where a 1 signifies that species tend to forage at the top of the canopy. We also present the mean foliage density and distance from the trunk, as explained in *Additional details on foraging substrate, maneuver, foliage density and distance from the trunk* above. We include a column for hanging. Hanging is a

## Supplementary Material – Honeyeater ecomorphology and competition

modifier—attacks like gleaning and probing can be performed while hanging. Thus, the value presented here is the species-specific proportion of observed attacks made while hanging. Reaching, like hanging, is a modifier. It refers to foraging attacks where the legs or neck are completely extended to facilitate the attack. All of the foraging maneuvers (attacks) are explained in detail in Remsen and Robinson (1990). This includes columns 9-20 (columns I through T when opened in Microsoft Excel). Columns 21-30 (U to AD in Excel) refer to the species-specific proportion of attacks that were directed at that substrate. For instance, a species with a 0.5 value for nectarivory was observed foraging on flowers in 50% of the total observations. Dead refers to whether or not the observed substrate was dead. This was most typically tabulated for attacks directed at dead leaves, as frequently employed by *Xanthotis* species. Mean flower length is the average length of the flower fed on by that species. Note that species that were never recorded to forage on flowers are here provisionally coded as a zero; this might best be replaced by NA, depending upon the analysis question.

### *Assemblage phylogenetic diversity, trait disparity and climate correlates – unstandardized values and standardized using the richness null model*

Our unstandardized measures of phylogenetic distance were non-abundance-weighted (hereafter, “unweighted”) mean pairwise phylogenetic distance ( $MPD_{\text{phylo}}$ ) and  $MPD_{\text{phylo}}$  where the interspecific distances were weighted by species’ abundances in the community in question. Our measures of trait distance were analogous to unweighted and abundance-weighted mean pairwise Euclidean distances in multivariate morphological and ecological space ( $MPD_{\text{trait}}$ ). Rather than unstandardized  $MPD$ , most of our analyses

## Supplementary Material – Honeyeater ecomorphology and competition

1 employed a standardized effect size (SES) metric calculated after randomization of the  
2 observed community data matrix with a null model. In the main text we present results as  
3 standardized with a null model that maintains species richness, occurrence frequency, and  
4 dispersal probability. Here, we present results of assemblage phylogenetic diversity and  
5 trait disparity using unstandardized MPD and those standardized with a simpler null  
6 model that only maintains species richness (the richness null model of *picante*, Kembel et  
7 al. 2010).

8 Unstandardized  $MPD_{phylo}$  was positively correlated with unstandardized  
9 morphological  $MPD_{trait}$ . The same was true whether these MPD values were abundance-  
10 weighted ( $r^2 = 0.40$ ,  $p < 0.001$ ) or not ( $r^2 = 0.21$ ,  $p < 0.001$ ). That is, assemblages  
11 composed of distantly related species were characterized by morphologically disparate  
12 species. Unstandardized  $MPD_{phylo}$  did not, however, show any clear correlations with  
13 unstandardized ecological trait disparity. When not abundance-weighted, there was a very  
14 weak negative correlation between the two ( $r^2 = 0.03$ ,  $p < 0.001$ ). The relationship was  
15 not significant when abundance-weighted.

16 When unweighted morphological  $MPD_{trait}$  was standardized with the richness null  
17 model, none of the observed communities were considered significantly clustered in  
18 morphospace, while three were considered overdispersed. The mean SES was 0.07.  
19 When abundance-weighted, no sites were significantly clustered in morphospace, four  
20 were overdispersed, and the mean SES was 0.02. From an ecological perspective, using  
21 this simple null model and unweighted  $MPD_{trait}$ , 77 of the communities were considered  
22 clustered in ecological space. Ten of the communities were considered overdispersed.

## Supplementary Material – Honeyeater ecomorphology and competition

The mean SES was -0.49. When abundance-weighted, 72 of the communities were considered clustered, none were considered overdispersed, and the mean SES was -1.27.

There was a weak negative correlation between morphological SES  $MPD_{\text{trait}}$  and mean annual temperature both when unweighted and abundance-weighted ( $r^2 = 0.05$ ,  $p < 0.001$  for both). There was a fairly strong positive correlation between morphological SES  $MPD_{\text{trait}}$  and mean annual precipitation both when unweighted ( $r^2 = 0.36$ ,  $p < 0.001$ ) and when abundance-weighted ( $r^2 = 0.47$ ,  $p < 0.001$ ). Thus, like our preferred dispersal null model, results were qualitatively similar even with a simple richness null model: co-occurring honeyeaters are morphologically more similar in drier and, to a lesser degree, warmer sites.

Ecological SES  $MPD_{\text{trait}}$  and mean annual temperature were negatively correlated, both when unweighted ( $r^2 = 0.21$ ,  $p < 0.001$ ) and abundance-weighted ( $r^2 = 0.13$ ,  $p < 0.001$ ). Morphological SES  $MPD_{\text{trait}}$  and mean annual precipitation also were negatively correlated, both when unweighted ( $r^2 = 0.26$ ,  $p < 0.001$ ) and abundance-weighted ( $r^2 = 0.11$ ,  $p < 0.001$ ). Thus, like our preferred dispersal null model, results were qualitatively similar even with a simple richness null model: co-occurring honeyeaters are ecologically disparate in dry and cold sites.

Honeyeater morphological diversity increased with phylogenetic diversity. Both when unweighted and ( $r^2 = 0.21$ ,  $p < 0.001$ ) abundance weighted, SES  $MPD_{\text{trait}}$  was correlated with SES  $MPD_{\text{phylo}}$  ( $r^2 = 0.36$ ,  $p < 0.001$ ). Ecological diversity was very weakly negatively correlated with phylogenetic diversity, both when unweighted ( $r^2 = 0.07$ ,  $p < 0.001$ ) and abundance-weighted ( $r^2 = 0.01$ ,  $p = 0.01$ ).



## Supplementary Material – Honeyeater ecomorphology and competition

### 1 *Phylogenetic and trait fields – unstandardized values and standardized using the richness* 2 *null model*

3 When using a null model that only maintains species richness, species tended to occur in  
4 phylogenetically clustered assemblages across their ranges. This is not surprising, since it  
5 is essentially the same result as Miller et al. (2013), recapitulated in a species-centered  
6 format. As a reminder, a species' standardized phylogenetic field is a measure of its  
7 relatedness to the other species it co-occurs with across its range, standardized to null  
8 model expectations. The trend for species to occur in phylogenetically clustered  
9 assemblages was not significant when unweighted, where the mean standardized  
10 phylogenetic field was -0.50 (Wilcoxon signed rank test that  $\mu = 0$ ,  $p = 0.62$ ). When  
11 abundance-weighted by species relative abundances, the mean field was -4.61 (Wilcoxon  
12 signed rank test  $p = 0.001$ ).

13 Morphologically, when using the richness null model, species tended to occur in  
14 overdispersed trait fields. When unweighted, the mean trait field was 4.18 (Wilcoxon  
15 signed rank test  $p < 0.001$ ). When abundance-weighted, the mean was 2.79 (Wilcoxon  
16 signed rank test  $p < 0.001$ ).

17 Ecologically, however, when using the richness null model, species tended to  
18 occur in clustered trait fields. This is presumably because species from similar habitats  
19 resembled each other in many broad foraging characteristics such as average canopy  
20 height and foliage density. Indeed, this was one impetus for the development of the  
21 dispersal null model. When unweighted, the mean ecological trait field was -8.36  
22 (Wilcoxon signed rank test  $p < 0.001$ ). When abundance-weighted the mean was -10.23  
23 (Wilcoxon signed rank test  $p < 0.001$ ).

## Supplementary Material – Honeyeater ecomorphology and competition

1           Like the results with the dispersal null model, when standardized with a richness  
2 null model there were strong correlations between species' phylogenetic fields and trait  
3 fields. Using phylogenetic generalized least squares regressions, species from  
4 phylogenetically overdispersed assemblages tended to occur with morphologically  
5 dissimilar species, both when unweighted ( $r^2 = 0.57, p < 0.001$ ) and when abundance-  
6 weighted ( $r^2 = 0.30, p < 0.001$ ). This relationship held with unstandardized MPD<sub>phylo</sub> and  
7 MPD<sub>trait</sub>, both when unweighted ( $r^2 = 0.57, p < 0.001$ ) and abundance-weighted ( $r^2 =$   
8  $0.40, p < 0.001$ ).

9           As with the dispersal null model, species phylogenetic and ecological trait fields  
10 did not exhibit a clear relationship when assessed with a richness null model. The lack of  
11 a relationship here is telling—despite notable variation in the phylogenetic neighborhood  
12 species find themselves in, there is no consistent pattern in the ecological similarity of  
13 these species to those species with which they co-occur. Thus, when standardized  
14 phylogenetic and trait field metrics were unweighted, we observed no significant  
15 relationship between the two ( $r^2 = 0.02, p = 0.23$ ); abundance-weighting resulted in a  
16 weak significant positive relationship ( $r^2 = 0.08, p = 0.02$ ). There was a significant  
17 negative correlation when unstandardized, unweighted distances were used ( $r^2 = 0.35, p <$   
18  $0.001$ ), but not when unstandardized abundance-weighted distances were used ( $r^2 = 0.02,$   
19  $p = 0.30$ ).

20           To summarize these results as compared with those in the main text, when  
21 dispersal probabilities and species' occurrence frequencies were not accounted for, many  
22 more species were found to occur in phylogenetically clustered assemblages. Moreover,  
23 many more species were found to occur in assemblages of ecologically similar species.

## Supplementary Material – Honeyeater ecomorphology and competition

Despite these differences, the general pattern of species from phylogenetically clustered assemblages occurring with morphologically similar but ecologically dissimilar species was not obfuscated by using the richness null model. This model makes the potentially unrealistic assumption of allowing any species to occur with equal probability in any assemblage across the continent.

## LITERATURE CITED

- Claramunt, S., E. P. Derryberry, J. V. Remsen, and R. T. Brumfield. 2012. High dispersal ability inhibits speciation in a continental radiation of passerine birds. *Proceedings of the Royal Society of London B: Biological Sciences* 279:1567–1574.
- Kembel, S. W., P. D. Cowan, M. R. Helmus, W. K. Cornwell, H. Morlon, D. D. Ackerly, S. P. Blomberg, et al. 2010. Picante: R tools for integrating phylogenies and ecology. *Bioinformatics* 26:1463–1464.
- Miller, E. T., A. E. Zanne, and R. E. Ricklefs. 2013. Niche conservatism constrains Australian honeyeater assemblages in stressful environments. *Ecology Letters* 16:1186–1194.
- Pennycuik, C. J. 2008. *Modelling the flying bird*. Academic Press, Burlington, MA.
- Remsen, J. V., and S. K. Robinson. 1990. A classification scheme for foraging behavior of birds in terrestrial habitats. *Studies in Avian Biology* 13:144–160.
